# Supplementary material for: Antimicrobial Properties of Amino-Acid-Derived N-Heterocyclic Carbene Silver Complexes
Source: MDPI journal article supplement (doi:10.3390/pharmaceutics14040748), 2022-03-30
Supplement: s1 [file s1]

# Antimicrobial properties of amino acid-derived N-heterocyclic carbene silver complexes

Adrián Sánchez, Carlos J. Carrasco, Francisco Montilla, Eleuterio Álvarez, Agustín Galindo, María Pérez-Aranda, Eloísa Pajuelo, and Ana Alcudia

## SUPPLEMENTARY DATA

**Table S1.** Crystal data and structure refinement for **2a**.

**Table S2.** Selected structural parameters for **2a** (bond lengths [Å] and angles [°]).

**Figure S1.** Coordination 1D polymer formed by **2a** viewed along *a* axis.

**Figure S2.** 3D packing of **2a** viewed along *b* axis.

**Figure S3.** Non-classical C-H...O hydrogen bonds in the unit cell of **2a**. **Microbiological assays.**

**Figure S4.** Relative MDA quantification for complex **2b** (control is considered as 100%) for *E. coli* (in blue) and *P. aeruginosa* (in red) assays. Control ranges are 0-0.2 nMol/mg for *E. coli* and 0.1-0.27 nMol/mg for *P. aeruginosa*.

**Figure S5.** Relative MDA quantification for complex **2c** (control is considered as 100%) for *E. coli* (in blue) and *P. aeruginosa* (in red) assays. Control ranges are 0-0.2 nMol/mg for *E. coli* and 0.1-0.27 nMol/mg for *P. aeruginosa*.

**Figure S6.** Evaluation of biofilm formation of *E. coli* (top) and *P. aeruginosa* (bottom) exposed to complex **2b** (A: control, B: MIC, C: MBC).

**Figure S7.** Evaluation of biofilm formation of *E. coli* (top) and *P. aeruginosa* (bottom) exposed to complex **2c** (A: control, B: MIC, C: MBC).

**Figure S8.** Optimised structures of compounds [Im<sup>Mes,R</sup>], **1**.

**Figure S9.** Optimised structures of compounds **1'**, carbene isomers of [Im<sup>Mes,R</sup>].

**Figure S10.** HOMOs of compounds **1'**.

**Figure S11.** Optimised structures of {Ag[NHC<sup>Mes,R</sup>]}<sub>2</sub> complexes, **2b<sub>c</sub>**-**2d<sub>c</sub>**.

**Figure S12.** Optimised structures of [NHC<sup>Mes,R</sup>]<sup>-</sup> ligands.

**Figure S13.** Selected MOs of [NHC<sup>Mes,R</sup>]<sup>-</sup> ligands.

**Figure S14.** <sup>1</sup>H-DOSY spectrum (500 MHz, 25 °C, Cl<sub>3</sub>CD) of the mixture of **1a** and **2a**.

**Figure S15.** Determination of the maximum distance between the two farthest atoms in the optimised structures of compound [Im<sup>Mes,H</sup>], **1a**, and complex {Ag[NHC<sup>Mes,H</sup>]}<sub>2</sub>, **2a**.

**Table S3.** Coordinates of the optimised compounds.

**Table S1.** Crystal data and structure refinement for **2a**.

| Compound                                         | <b>2a</b>                                                       |
|--------------------------------------------------|-----------------------------------------------------------------|
| Formula                                          | C <sub>14</sub> H <sub>15</sub> AgN <sub>2</sub> O <sub>2</sub> |
| M                                                | 351.15                                                          |
| <i>T</i> [K]                                     | 193(2)                                                          |
| Wavelength [Å]                                   | 0.71073                                                         |
| Crystal system                                   | Monoclinic                                                      |
| Space group                                      | <i>P</i> 2 <sub>1</sub> /c                                      |
| <i>a</i> [Å]                                     | 9.3237(12)                                                      |
| <i>b</i> [Å]                                     | 11.6432(13)                                                     |
| <i>c</i> [Å]                                     | 17.894(2)                                                       |
| $\alpha = \gamma$ [°]                            | 90                                                              |
| $\beta$ [°]                                      | 92.359(6)                                                       |
| <i>V</i> [Å <sup>3</sup> ]                       | 1940.9(4)                                                       |
| <i>Z</i>                                         | 4                                                               |
| <i>D</i> <sub>calcd.</sub> [Mg·m <sup>-3</sup> ] | 1.202                                                           |
| $\mu$ [mm <sup>-1</sup> ]                        | 1.038                                                           |
| <i>F</i> (000)                                   | 704                                                             |
| Crystal size [mm <sup>3</sup> ]                  | 0.250 x 0.100 x 0.050                                           |
| $\theta$ range for data collection [°]           | 2.087 to 27.747                                                 |
| Index ranges                                     | -12 ≤ <i>h</i> ≤ 12, -15 ≤ <i>k</i> ≤ 15, -23 ≤ <i>l</i> ≤ 23   |
| Reflections collected                            | 43542                                                           |
| Independent reflections                          | 4565 [R(int) = 0.1133]                                          |
| Completeness to theta                            | = 25.242°<br>100.0 %                                            |
| Absorption correction                            | Semi-empirical from equivalents                                 |
| Max. and min. transmission                       | 0.7461 and 0.4620                                               |
| Refinement method                                | Full-matrix least-squares on <i>F</i> <sup>2</sup>              |
| Data / restraints / parameters                   | 4565 / 18 / 175                                                 |
| Goodness-of-fit on <i>F</i> <sup>2</sup>         | 1.099                                                           |
| Final R indices [ <i>I</i> > 2σ( <i>I</i> )]     | R1 = 0.0955, wR2 = 0.2447                                       |
| R indices (all data)                             | R1 = 0.1269, wR2 = 0.2582                                       |
| Extinction coefficient                           | n/a                                                             |
| Largest diff. peak and hole [e·Å <sup>-3</sup> ] | 2.903 and -1.693                                                |

**Table S2.** Selected structural parameters for **2a** (bond lengths [Å] and angles [°]).

|                    |           |                  |           |
|--------------------|-----------|------------------|-----------|
| Ag(1)-C(1)         | 2.046(8)  | C(4)-C(9)        | 1.379(15) |
| Ag(1)-O(1)#1       | 2.100(6)  | C(4)-C(5)        | 1.390(11) |
| O(1)-C(14)         | 1.245(11) | C(5)-C(6)        | 1.378(15) |
| O(2)-C(14)         | 1.187(12) | C(5)-C(10)       | 1.496(17) |
| N(1)-C(3)          | 1.362(12) | C(6)-C(7)        | 1.357(19) |
| N(1)-C(1)          | 1.364(10) | C(7)-C(8)        | 1.386(19) |
| N(1)-C(4)          | 1.444(11) | C(7)-C(11)       | 1.497(16) |
| N(2)-C(1)          | 1.348(11) | C(8)-C(9)        | 1.347(17) |
| N(2)-C(2)          | 1.393(12) | C(9)-C(12)       | 1.539(16) |
| N(2)-C(13)         | 1.449(11) | C(13)-C(14)      | 1.553(13) |
| C(2)-C(3)          | 1.337(14) |                  |           |
| C(1)-Ag(1)-O(1)#1  | 170.4(3)  | C(6)-C(5)-C(4)   | 116.8(10) |
| C(14)-O(1)-Ag(1)#2 | 114.2(6)  | C(6)-C(5)-C(10)  | 122.2(9)  |
| C(3)-N(1)-C(1)     | 112.2(7)  | C(4)-C(5)-C(10)  | 121.1(9)  |
| C(3)-N(1)-C(4)     | 125.6(7)  | C(7)-C(6)-C(5)   | 123.1(11) |
| C(1)-N(1)-C(4)     | 122.1(7)  | C(6)-C(7)-C(8)   | 117.1(11) |
| C(1)-N(2)-C(2)     | 110.8(7)  | C(6)-C(7)-C(11)  | 120.4(14) |
| C(1)-N(2)-C(13)    | 124.2(7)  | C(8)-C(7)-C(11)  | 122.5(15) |
| C(2)-N(2)-C(13)    | 124.8(8)  | C(9)-C(8)-C(7)   | 123.2(13) |
| N(2)-C(1)-N(1)     | 103.6(7)  | C(8)-C(9)-C(4)   | 117.7(11) |
| N(2)-C(1)-Ag(1)    | 133.0(6)  | C(8)-C(9)-C(12)  | 122.9(12) |
| N(1)-C(1)-Ag(1)    | 123.4(6)  | C(4)-C(9)-C(12)  | 119.4(10) |
| C(3)-C(2)-N(2)     | 107.0(8)  | N(2)-C(13)-C(14) | 111.5(7)  |
| C(2)-C(3)-N(1)     | 106.5(8)  | O(2)-C(14)-O(1)  | 128.7(9)  |
| C(9)-C(4)-C(5)     | 122.1(9)  | O(2)-C(14)-C(13) | 120.0(8)  |
| C(9)-C(4)-N(1)     | 119.1(8)  | O(1)-C(14)-C(13) | 111.3(8)  |
| C(5)-C(4)-N(1)     | 118.7(8)  |                  |           |

Symmetry transformations used to generate equivalent atoms: #1 -x+1,y-1/2,-z+1/2. #2 -x+1,y+1/2,-z+1/2.

**Figure S1.** Coordination 1D polymer formed by **2a** viewed along  $a$  axis.

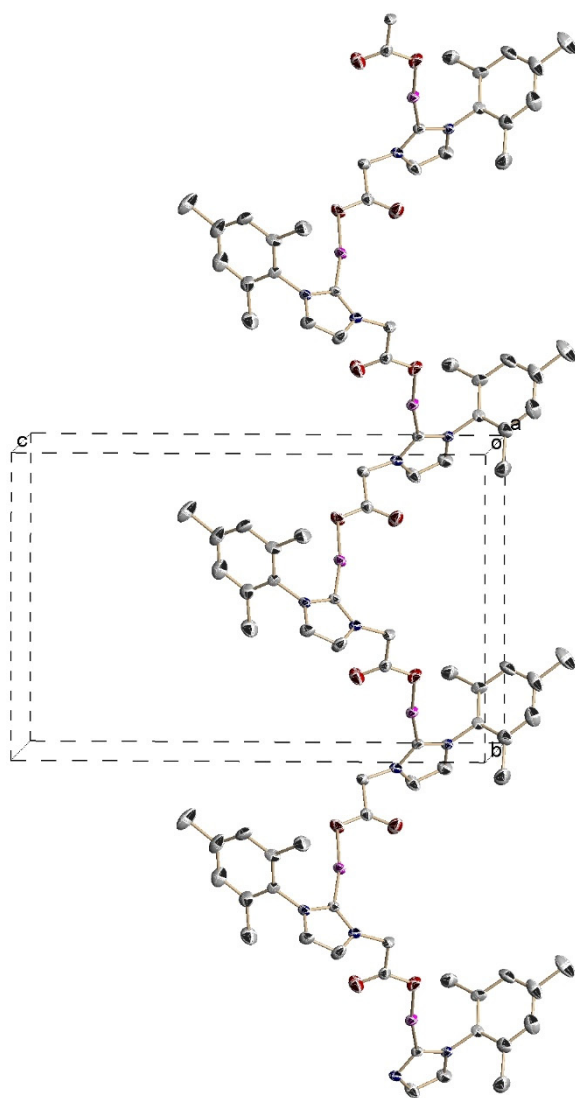



**Figure S2.** 3D packing of **2a** viewed along *b* axis.

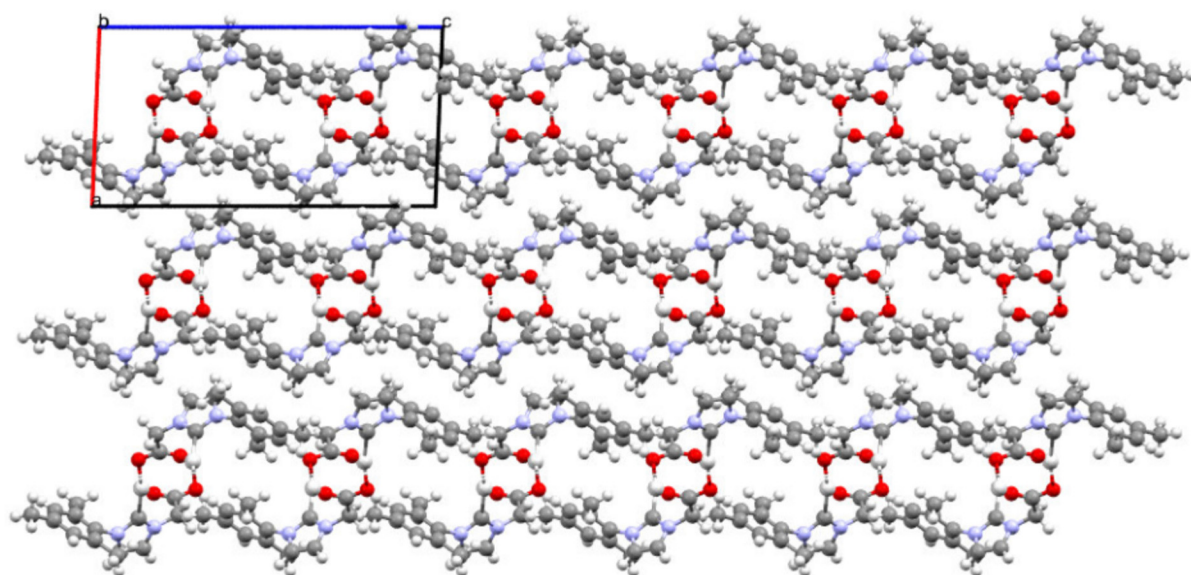

**Figure S3.** Non-classical C-H $\cdots$ O hydrogen bonds in the unit cell of **2a**.

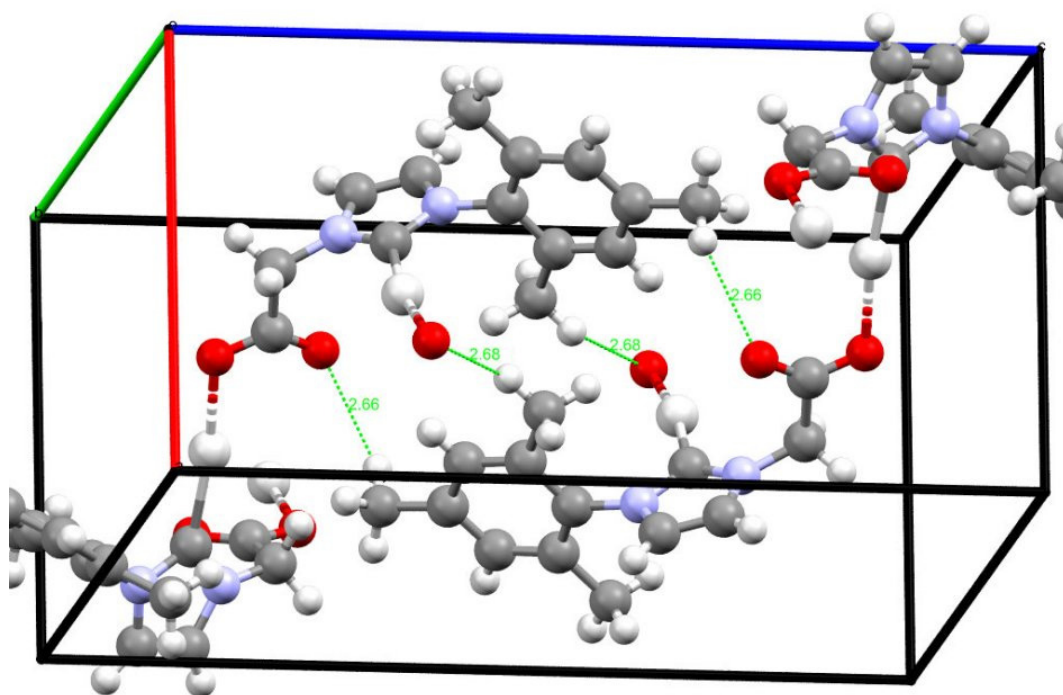

**Figure S4.** Relative MDA quantification for complex **2b** (control is considered as 100%) for *E. coli* (in blue) and *P. aeruginosa* (in red) assays. Control ranges are 0-0.2 nMol/mg for *E.coli* and 0.1-0.27 nMol/mg for *P. aeruginosa*.

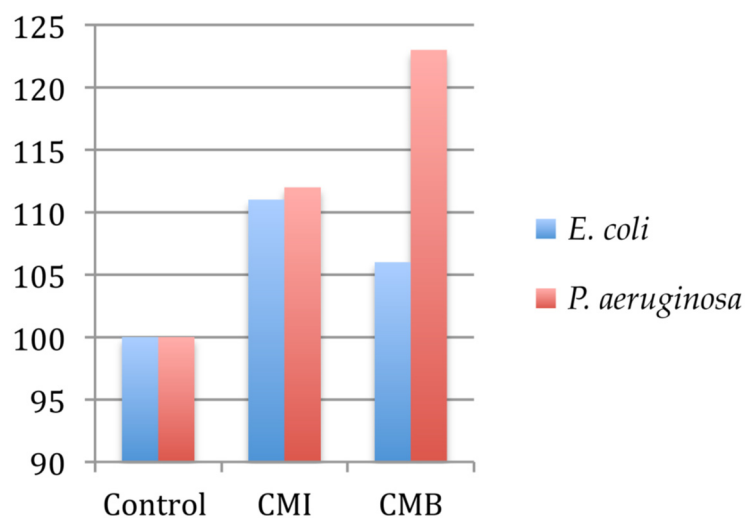

**Figure S5.** Relative MDA quantification for complex **2c** (control is considered as 100%) for *E. coli* (in blue) and *P. aeruginosa* (in red) assays. Control ranges are 0-0.2 nMol/mg for *E.coli* and 0.1-0.27 nMol/mg for *P. aeruginosa*.

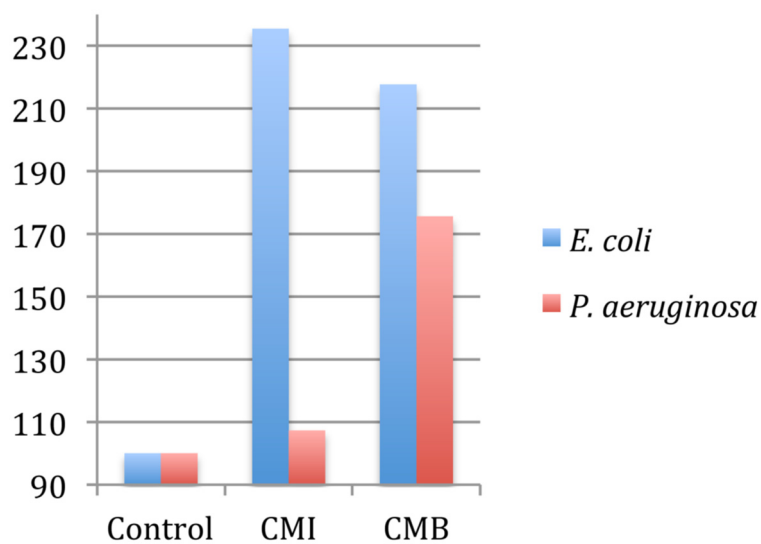

**Figure S6.** Evaluation of biofilm formation of *E. coli* (top) and *P. aeruginosa* (bottom) exposed to complex **2b** (A: control, B: MIC, C: MBC).

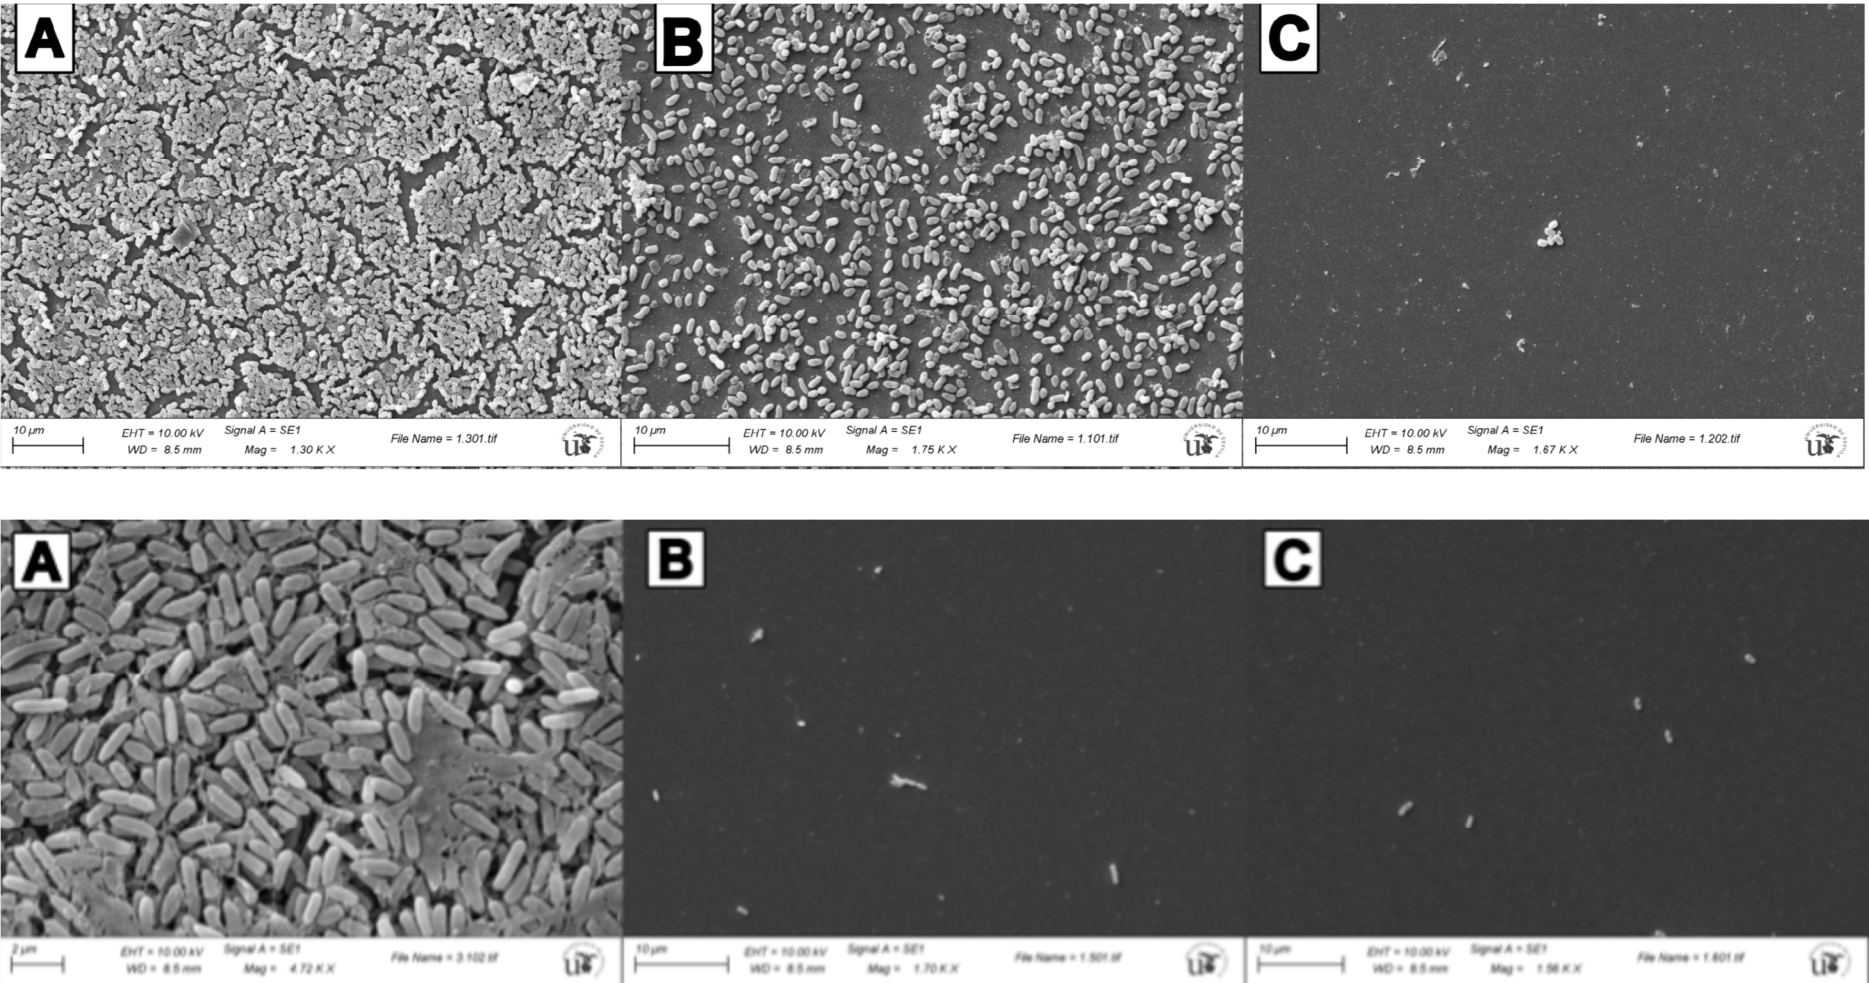

**Figure S7.** Evaluation of biofilm formation of *E. coli* (top) and *P. aeruginosa* (bottom) exposed to complex **2c** (A: control, B: MIC, C: MBC).

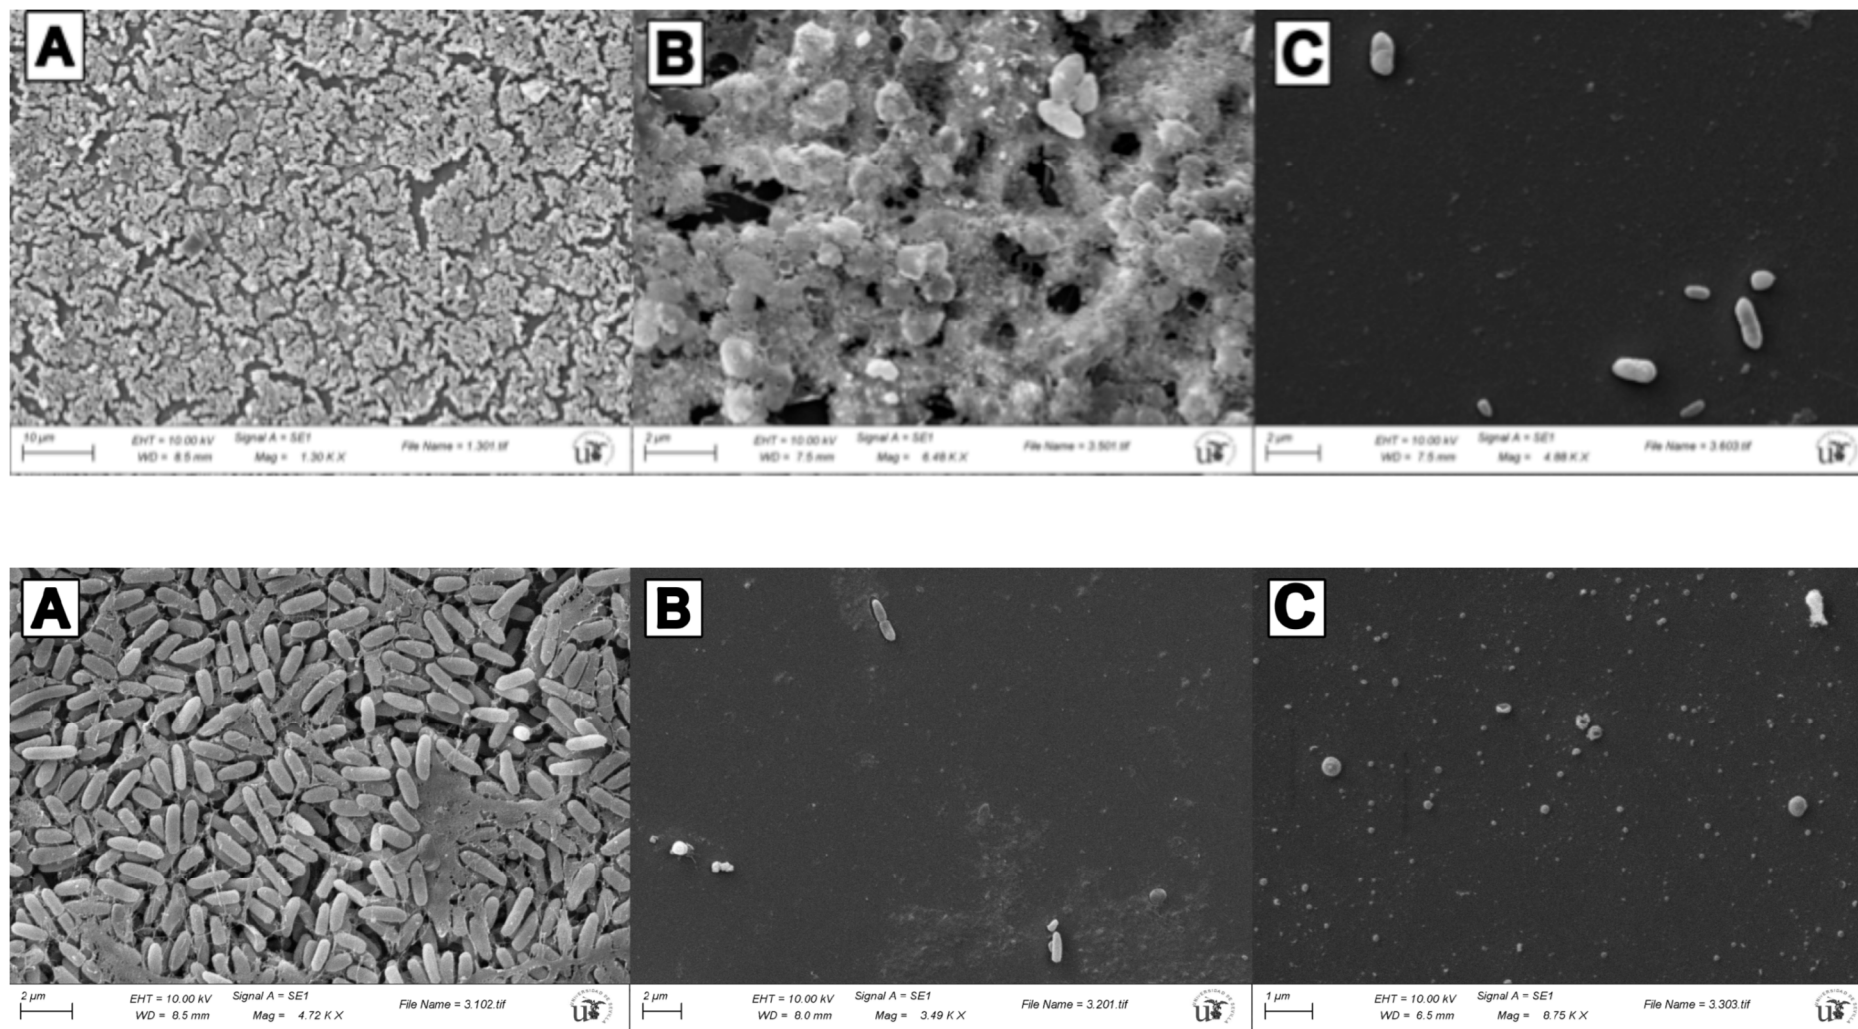

**Figure S8.** Optimised structures of compounds  $[\text{Im}^{\text{Mes,R}}]$ , **1**.

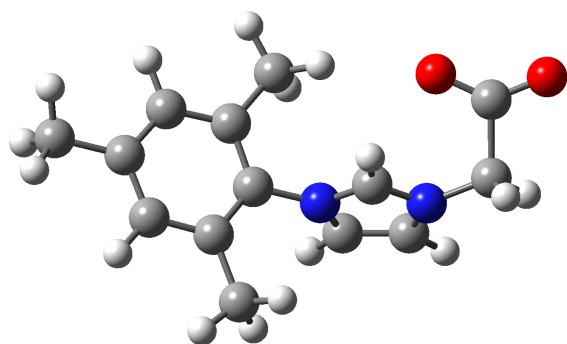

$[\text{Im}^{\text{Mes,H}}]$

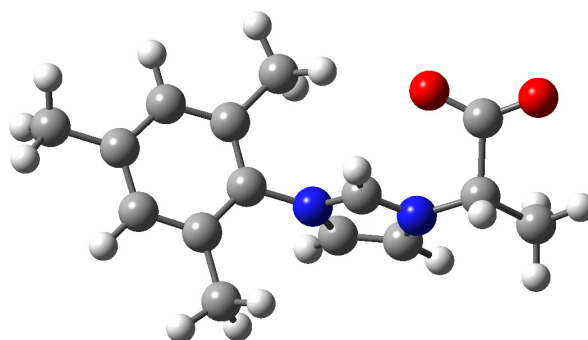

$[\text{Im}^{\text{Mes,Me}}]$

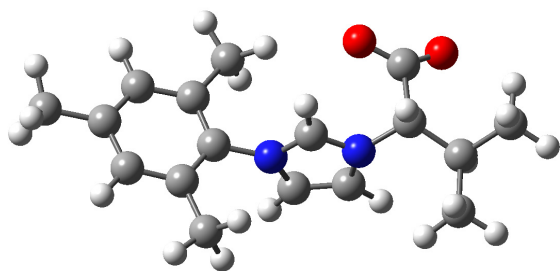

$[\text{Im}^{\text{Mes,iPr}}]$

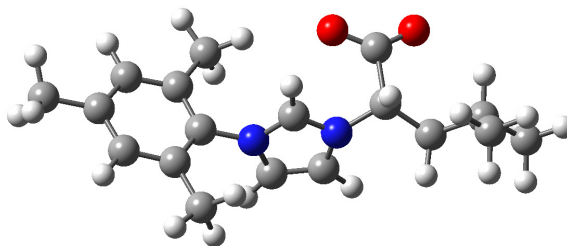

$[\text{Im}^{\text{Mes,iBu}}]$

**Figure S9.** Optimised structures of compounds **1'**, carbene isomers of  $[\text{Im}^{\text{Mes,R}}]$ .

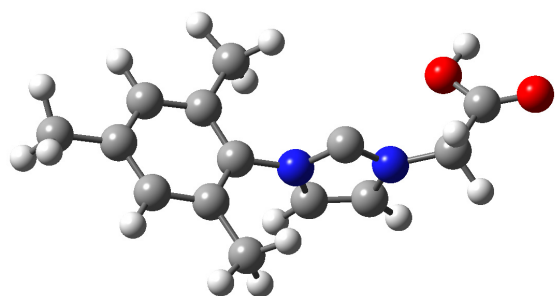

R = H

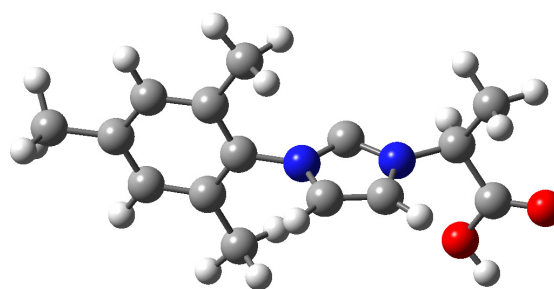

R = Me

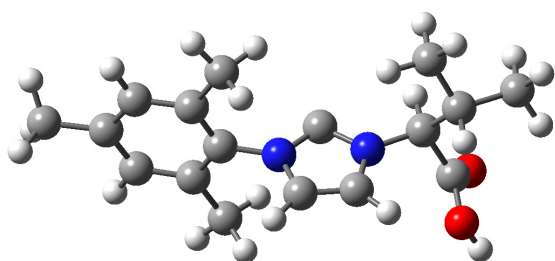

R = <sup>i</sup>Pr

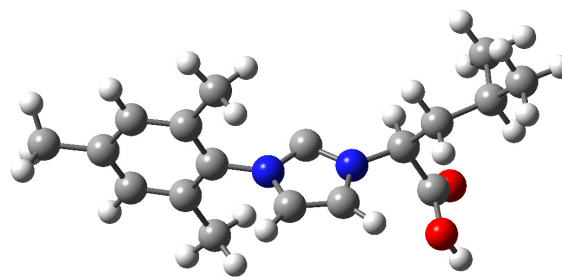

R = <sup>i</sup>Bu

**Figure S10.** HOMOs of compounds **1'**.

R = H

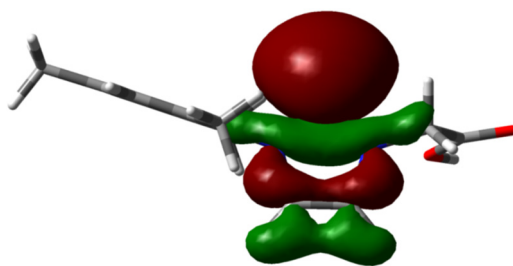

R = Me

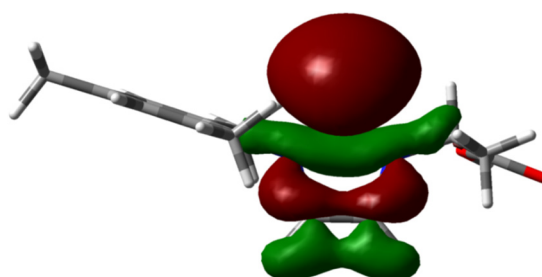

R = <sup>i</sup>Pr

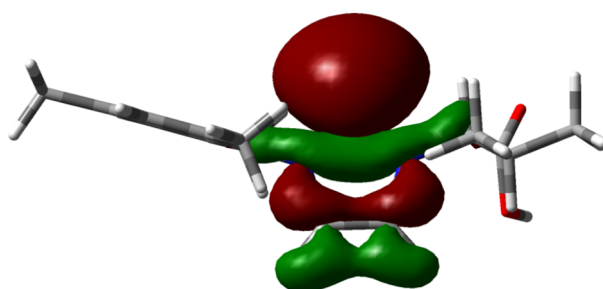

R = <sup>i</sup>Bu

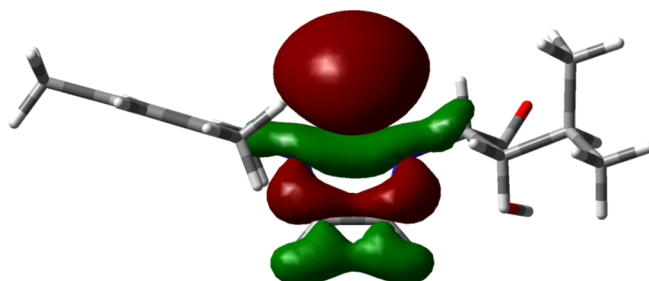



**Figure S11.** Optimised structures of  $\{\text{Ag}[\text{NHC}^{\text{Mes,R}}]\}_2$  complexes, **2b<sub>c</sub>**-**2d<sub>c</sub>**.

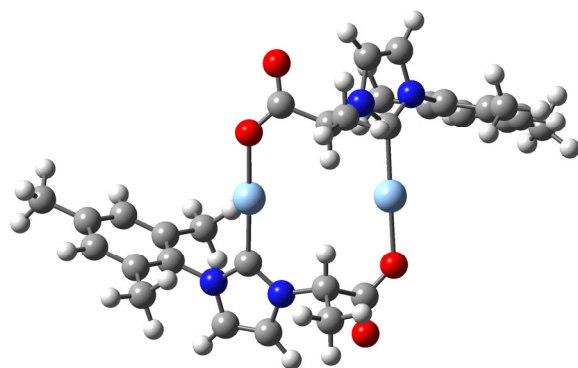

$\{\text{Ag}[\text{NHC}^{\text{Mes,Me}}]\}_2$ , **2b<sub>c</sub>**

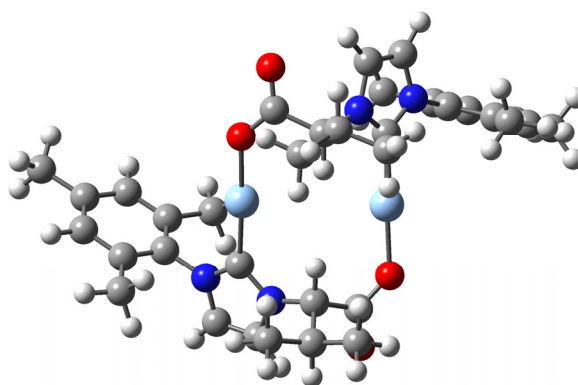

$\{\text{Ag}[\text{NHC}^{\text{Mes,iPr}}]\}_2$ , **2c<sub>c</sub>**

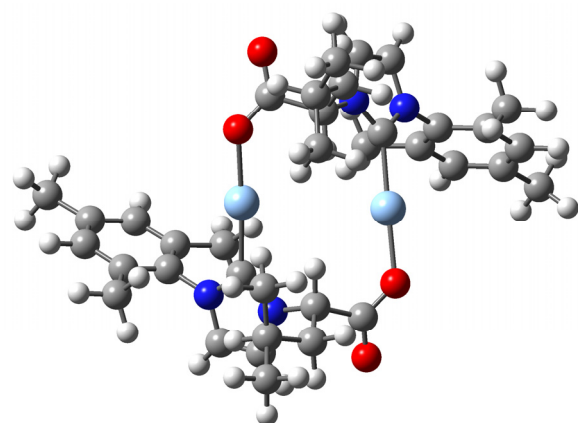

$\{\text{Ag}[\text{NHC}^{\text{Mes,iBu}}]\}_2$ , **2d<sub>c</sub>**



**Figure S12.** Optimised structures of  $[\text{NHC}^{\text{Mes},\text{R}}]^-$  ligands.

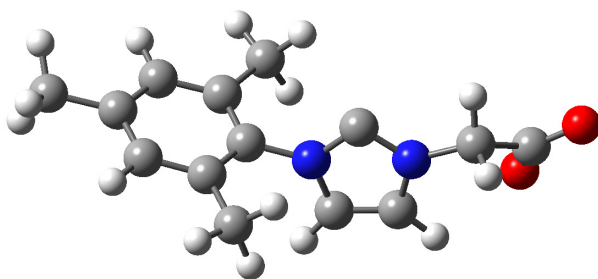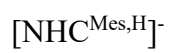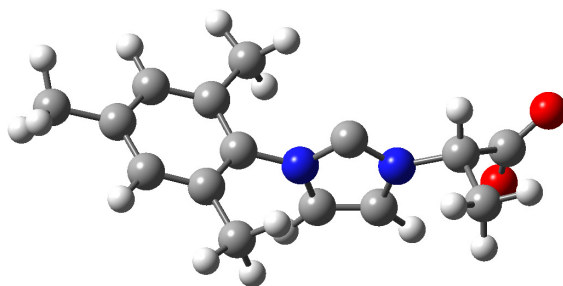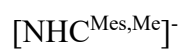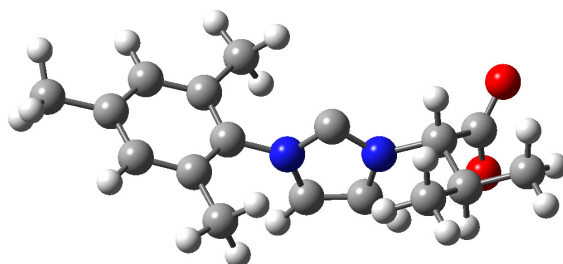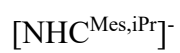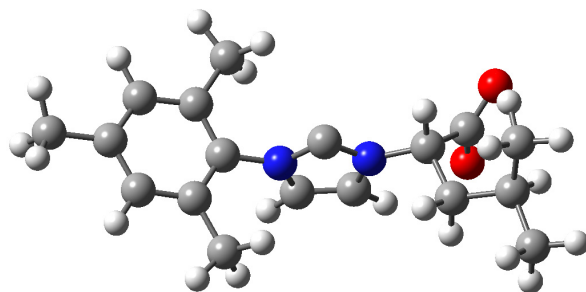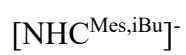

**Figure S13.** Selected MOs of  $[\text{NHC}^{\text{Mes,R}}]^-$  ligands.

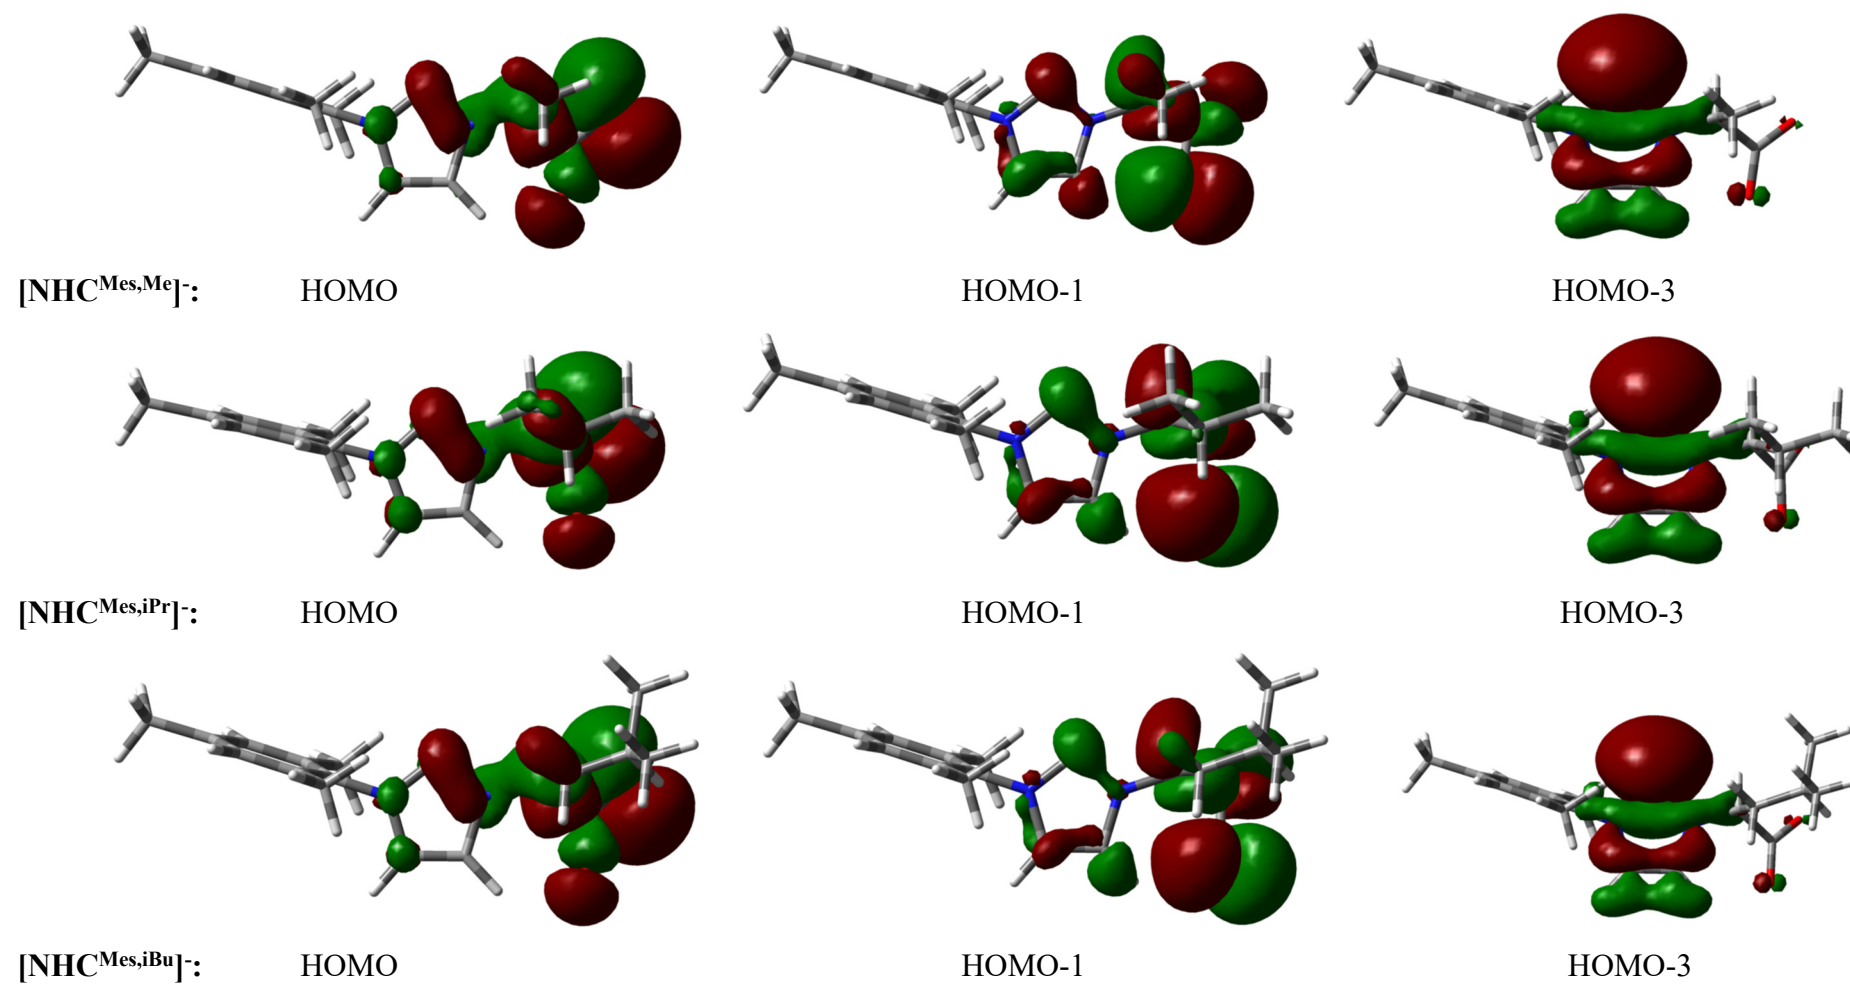

**Figure S14.**  $^1\text{H}$ -DOSY spectrum (500 MHz, 300 K,  $\text{Cl}_3\text{CD}$ ). Pulse program: ledbpgp2s,  $\delta = 0.9$  ms,  $\Delta = 120$  ms, LED = 5 ms, recycle delay: 5 s, 16 scans, time domain: 38k x 24 points, measurement time: 55 min, apodization: exponential broadening (0.3 Hz), spectrum: 32 k x 64 points.

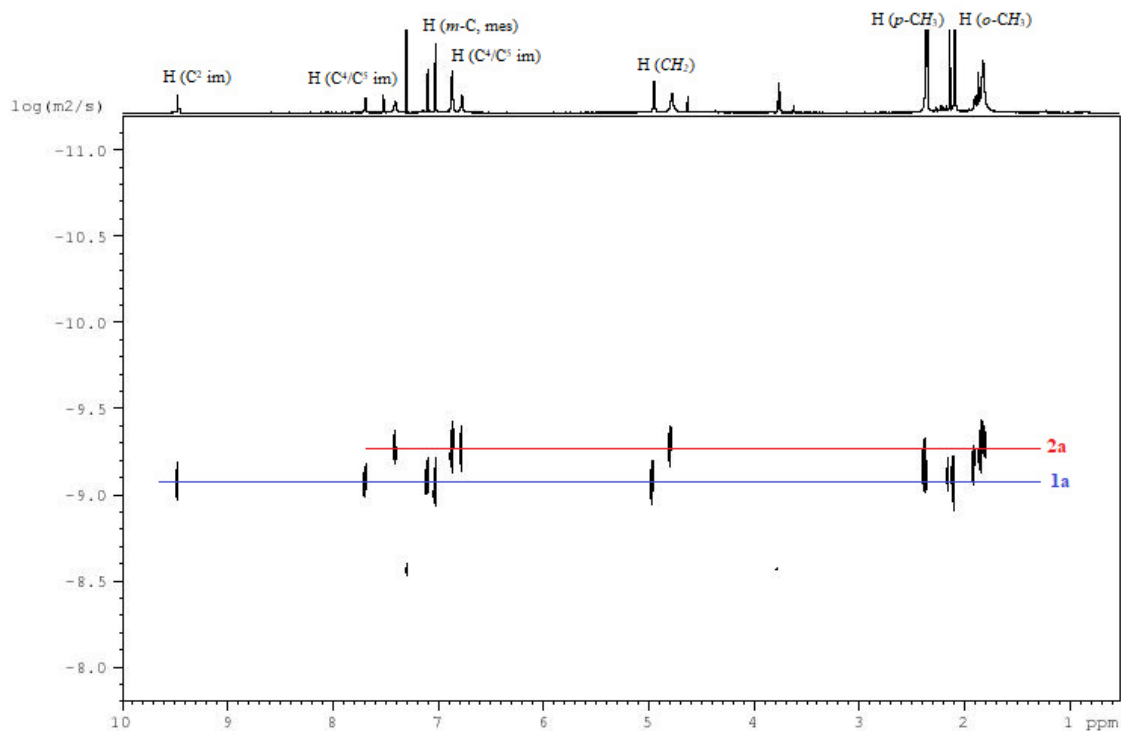

**Figure S15.** Determination of the maximum distance between the two farthest atoms in the optimised structures of compound  $[\text{Im}^{\text{Mes,H}}]$ , **1a**, and complex  $\{\text{Ag}[\text{NHC}^{\text{Mes,H}}]\}_2$ , **2a**

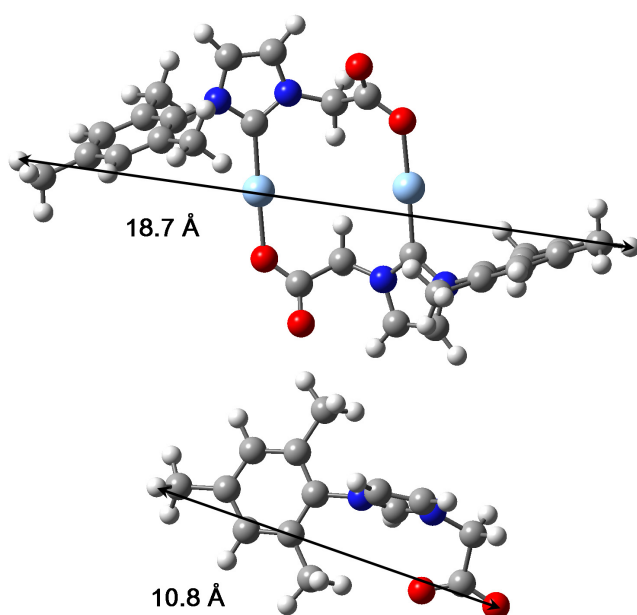

**Table S3.** Coordinates of the optimised compounds.

*Compounds [Im<sup>Mes,R</sup>], 1.*

[Im<sup>Mes,H</sup>]

|   |             |             |             |
|---|-------------|-------------|-------------|
| O | 5.00639200  | -1.34079900 | -0.65947100 |
| N | 2.34501500  | 0.98106500  | 0.03314400  |
| N | 0.19840900  | 0.75119000  | 0.34068300  |
| C | 1.22388800  | 0.47488100  | -0.48187000 |
| C | 0.69853000  | 1.43220400  | 1.44308700  |
| H | 0.06231500  | 1.74414700  | 2.25238200  |
| C | 2.03653900  | 1.57059200  | 1.24692700  |
| H | 2.79299200  | 2.02709100  | 1.86107000  |
| C | 3.67547800  | 0.59554200  | -0.44934400 |
| H | 3.83328400  | 1.00374400  | -1.44851900 |
| C | 3.83074400  | -0.99728400 | -0.53110600 |
| O | 2.75553200  | -1.63484800 | -0.48889500 |
| C | -1.15585500 | 0.28057200  | 0.15381700  |
| C | -2.11336100 | 1.15980400  | -0.36689500 |
| C | -1.44611100 | -1.05078400 | 0.49090300  |
| C | -3.40918700 | 0.67079300  | -0.54346400 |
| C | -2.75753900 | -1.48585400 | 0.28736000  |
| C | -3.74997700 | -0.64499800 | -0.22204900 |
| H | -4.16589700 | 1.33315100  | -0.95129800 |
| H | -3.00571500 | -2.51319700 | 0.53383200  |
| C | -0.39954300 | -1.97743500 | 1.06075400  |
| H | 0.49953600  | -2.04215300 | 0.44064600  |
| H | -0.07395400 | -1.63714400 | 2.04935300  |
| H | -0.80814200 | -2.98194600 | 1.17572700  |
| C | -1.76719900 | 2.58064500  | -0.74202500 |
| H | -1.44985700 | 3.16526000  | 0.12635300  |
| H | -0.95098400 | 2.61844100  | -1.46917600 |
| H | -2.63080300 | 3.08045300  | -1.18196100 |
| C | -5.16255700 | -1.14482600 | -0.40088800 |
| H | -5.71234900 | -1.10070000 | 0.54534700  |
| H | -5.71038100 | -0.54291900 | -1.12855900 |
| H | -5.17637000 | -2.18395400 | -0.73749800 |
| H | 1.15441000  | -0.08871400 | -1.39310000 |
| H | 4.41944700  | 1.01473800  | 0.22429700  |

[Im<sup>Mes,Me</sup>]

|   |             |             |             |
|---|-------------|-------------|-------------|
| O | 4.58137900  | -1.71414500 | -0.72233400 |
| N | 2.11001200  | 0.81132900  | -0.02392400 |
| N | -0.04181300 | 0.67441900  | 0.31995400  |
| C | 0.95776900  | 0.35190800  | -0.51635100 |
| C | 0.50473500  | 1.33942300  | 1.40947900  |
| H | -0.10413100 | 1.68628300  | 2.22555500  |
| C | 1.84421100  | 1.42079700  | 1.19172700  |
| H | 2.62013300  | 1.85588800  | 1.79417600  |
| C | 3.41411800  | 0.35588400  | -0.55328000 |
| H | 3.44706700  | 0.66112800  | -1.60265700 |
| C | 3.44531000  | -1.26149800 | -0.56996700 |
| O | 2.32602500  | -1.81216700 | -0.47456300 |
| C | 4.58607600  | 0.96971200  | 0.19379100  |
| H | 4.59787800  | 0.66609800  | 1.24411500  |
| C | -1.42002100 | 0.27274600  | 0.15023800  |
| C | -2.33440600 | 1.19481500  | -0.37437500 |
| C | -1.77768700 | -1.03713300 | 0.50593000  |
| C | -3.65554800 | 0.77285500  | -0.53626100 |
| C | -3.11170200 | -1.40493300 | 0.31626100  |
| C | -4.06238200 | -0.51929700 | -0.19657000 |
| H | -4.37936500 | 1.46911600  | -0.94740700 |
| H | -3.41166600 | -2.41486600 | 0.57675800  |
| C | -0.77785300 | -2.01054400 | 1.08125300  |
| H | 0.11761400  | -2.12049600 | 0.46256900  |
| H | -0.43724600 | -1.68068500 | 2.06839200  |
| H | -1.23522700 | -2.99330000 | 1.20160600  |

|   |             |             |             |
|---|-------------|-------------|-------------|
| C | -1.91716200 | 2.59115300  | -0.76853700 |
| H | -1.56405300 | 3.16814900  | 0.09107400  |
| H | -1.10459600 | 2.57785100  | -1.50060100 |
| H | -2.75628800 | 3.13031900  | -1.20949400 |
| C | -5.50057700 | -0.94629600 | -0.35981000 |
| H | -6.03926500 | -0.86705200 | 0.59053800  |
| H | -6.02275800 | -0.32195000 | -1.08746400 |
| H | -5.57136400 | -1.98569500 | -0.68844000 |
| H | 0.84301100  | -0.19818700 | -1.43087600 |
| H | 4.59886200  | 2.06285900  | 0.13167900  |
| H | 5.49548000  | 0.57725100  | -0.25771400 |

# [Im<sup>Mes,iPr</sup>]

|   |             |             |             |
|---|-------------|-------------|-------------|
| O | 3.72706500  | -2.20629300 | 0.28954500  |
| N | 1.62577500  | 0.46165800  | 0.09134000  |
| N | -0.53406100 | 0.45776000  | 0.41406800  |
| C | 0.44261000  | 0.24887300  | -0.48379400 |
| C | 0.06087200  | 0.78965800  | 1.62383100  |
| H | -0.52266800 | 0.99407200  | 2.50413000  |
| C | 1.40487500  | 0.78339400  | 1.42110200  |
| H | 2.21371300  | 0.95866100  | 2.10690800  |
| C | 2.87456600  | -0.06752300 | -0.50344600 |
| H | 2.77488700  | 0.09399900  | -1.58087600 |
| C | 2.76500000  | -1.67253900 | -0.26668800 |
| O | 1.67784100  | -2.12687600 | -0.68618900 |
| C | 4.13662900  | 0.64419600  | -0.00363900 |
| H | 4.29199600  | 0.36334700  | 1.04443500  |
| C | 5.35343600  | 0.13504300  | -0.79386600 |
| H | 6.26430600  | 0.61944600  | -0.43094300 |
| H | 5.45952300  | -0.94257600 | -0.68304200 |
| H | 5.25190800  | 0.37702800  | -1.85843100 |
| C | 4.04355400  | 2.17552400  | -0.12220600 |
| H | 3.90696700  | 2.47574100  | -1.16696000 |
| H | 3.22118800  | 2.60577400  | 0.45525100  |
| H | 4.96926500  | 2.63795800  | 0.23162500  |
| C | -1.94110900 | 0.23014800  | 0.17223000  |
| C | -2.75632500 | 1.31939700  | -0.16619200 |
| C | -2.42516700 | -1.08189800 | 0.27383900  |
| C | -4.10678000 | 1.06422400  | -0.40361000 |
| C | -3.78655700 | -1.27762600 | 0.02021800  |
| C | -4.63962300 | -0.22550400 | -0.31473300 |
| H | -4.75579000 | 1.89191700  | -0.67182800 |
| H | -4.18460500 | -2.28485100 | 0.08615100  |
| C | -1.53347700 | -2.23848400 | 0.65457100  |
| H | -0.62072900 | -2.29689800 | 0.05388200  |
| H | -1.21339600 | -2.15587500 | 1.69870900  |
| H | -2.07290100 | -3.18053900 | 0.55025700  |
| C | -2.20093200 | 2.71811200  | -0.28453800 |
| H | -1.77958900 | 3.06948300  | 0.66173100  |
| H | -1.40250900 | 2.77323500  | -1.03024800 |
| H | -2.98416000 | 3.41657900  | -0.58105900 |
| C | -6.10939900 | -0.46603300 | -0.55826400 |
| H | -6.70054600 | -0.18215000 | 0.31890700  |
| H | -6.47468100 | 0.12475200  | -1.40189800 |
| H | -6.31174200 | -1.51823300 | -0.76632600 |
| H | 0.29528800  | -0.08522300 | -1.49397900 |

# [Im<sup>Mes,iBu</sup>]

|   |             |             |             |
|---|-------------|-------------|-------------|
| O | -3.39690900 | 2.34133900  | -0.16086600 |
| N | -1.22163000 | -0.40307500 | 0.23818300  |
| N | 0.94659500  | -0.45216800 | 0.48883000  |
| C | -0.05311100 | -0.20299800 | -0.37297400 |
| C | 0.38537100  | -0.79528700 | 1.71131000  |
| H | 0.99268600  | -1.02792600 | 2.56813900  |
| C | -0.96444900 | -0.75927500 | 1.55231300  |
| H | -1.75403900 | -0.94541100 | 2.25705800  |
| C | -2.48768700 | 0.11425400  | -0.32333500 |
| H | -2.50595900 | -0.22017300 | -1.36312300 |
| C | -2.34995800 | 1.72900200  | -0.38276600 |

|   |             |             |             |
|---|-------------|-------------|-------------|
| O | -1.19815600 | 2.11589900  | -0.68035100 |
| C | -3.70870500 | -0.41457400 | 0.42759700  |
| H | -3.83836900 | 0.17606000  | 1.33905700  |
| C | -5.01912500 | -0.34549800 | -0.38540600 |
| H | -5.08171500 | 0.66382500  | -0.80024400 |
| C | 2.35051400  | -0.26518400 | 0.19991800  |
| C | 3.12595700  | -1.38022200 | -0.14368400 |
| C | 2.87201700  | 1.03614100  | 0.26120500  |
| C | 4.47559200  | -1.16480000 | -0.42731300 |
| C | 4.22763700  | 1.19185200  | -0.03933800 |
| C | 5.04341200  | 0.11076600  | -0.37960300 |
| H | 5.09379500  | -2.01371200 | -0.70116600 |
| H | 4.65320100  | 2.18961800  | -0.00667000 |
| C | 2.02097100  | 2.22156400  | 0.64676800  |
| H | 1.10333400  | 2.30204000  | 0.05659200  |
| H | 1.71229200  | 2.15445400  | 1.69535300  |
| H | 2.58704500  | 3.14624800  | 0.52872700  |
| C | 2.53180000  | -2.76568600 | -0.22472900 |
| H | 2.12916300  | -3.09338400 | 0.73791400  |
| H | 1.71096200  | -2.80994600 | -0.94652000 |
| H | 3.28780700  | -3.48841700 | -0.53359900 |
| C | 6.51105500  | 0.31392500  | -0.66619700 |
| H | 7.09566100  | 0.27374200  | 0.25924000  |
| H | 6.89871200  | -0.45903100 | -1.33306600 |
| H | 6.69546400  | 1.28674700  | -1.12696500 |
| H | 0.07083000  | 0.13054800  | -1.38585400 |
| H | -3.54456200 | -1.46101800 | 0.72224300  |
| C | -6.22024100 | -0.55143600 | 0.54658600  |
| H | -7.16134900 | -0.49474500 | -0.00803200 |
| H | -6.18171200 | -1.53352200 | 1.03351300  |
| H | -6.24667000 | 0.21326400  | 1.32755900  |
| C | -5.04765000 | -1.36626400 | -1.53194200 |
| H | -4.22368200 | -1.22823000 | -2.23832300 |
| H | -4.99145900 | -2.39210500 | -1.14842100 |
| H | -5.97608800 | -1.27781600 | -2.10324100 |

### *Compounds 1' (carbene isomer)*

R = H

|   |             |             |             |
|---|-------------|-------------|-------------|
| O | 3.89937300  | -1.44097600 | 0.15084700  |
| N | 2.17054100  | 0.66782800  | 0.00618700  |
| N | 0.09008900  | 0.37078400  | 0.33011800  |
| C | 1.01725900  | 0.38411200  | -0.67458500 |
| C | 0.64726700  | 0.63828500  | 1.58271300  |
| H | 0.06248700  | 0.67024000  | 2.48669600  |
| C | 1.96996500  | 0.82717700  | 1.37617900  |
| H | 2.76377700  | 1.04783700  | 2.07032800  |
| C | 3.44914600  | 0.78316000  | -0.65831400 |
| H | 3.25213200  | 0.85524700  | -1.72949700 |
| C | 4.42909100  | -0.36645500 | -0.46468200 |
| O | 5.57124200  | -0.31431300 | -0.84510000 |
| C | -1.31068000 | 0.11529200  | 0.11685800  |
| C | -2.17460500 | 1.19522600  | -0.10953100 |
| C | -1.77146000 | -1.20750300 | 0.13261300  |
| C | -3.53021700 | 0.92240000  | -0.30550900 |
| C | -3.13604100 | -1.43014600 | -0.06902800 |
| C | -4.03108400 | -0.38090300 | -0.28424300 |
| H | -4.20854300 | 1.75036500  | -0.48847600 |
| H | -3.50448000 | -2.45147800 | -0.06413000 |
| C | -0.82291700 | -2.36291300 | 0.33487400  |
| H | -0.06282700 | -2.38360500 | -0.45051800 |
| H | -0.29189300 | -2.28809700 | 1.28821000  |
| H | -1.36282900 | -3.31112600 | 0.32052900  |
| C | -1.65678900 | 2.61101700  | -0.16986100 |
| H | -1.18925000 | 2.91268600  | 0.77204300  |
| H | -0.89810400 | 2.71455700  | -0.95023300 |
| H | -2.46843200 | 3.30870100  | -0.38237000 |
| C | -5.50610400 | -0.64508500 | -0.47013100 |
| H | -6.04083700 | -0.57242100 | 0.48339200  |
| H | -5.95750600 | 0.07873600  | -1.15292700 |
| H | -5.68440700 | -1.64578900 | -0.87000100 |
| H | 4.59694600  | -2.11275500 | 0.19925800  |

|   |            |            |             |
|---|------------|------------|-------------|
| H | 3.96744500 | 1.69695000 | -0.35653400 |
|---|------------|------------|-------------|

R = Me

|   |             |             |             |
|---|-------------|-------------|-------------|
| O | 3.59426300  | -1.86598800 | -0.30833500 |
| N | 1.95678900  | 0.34448900  | -0.00320800 |
| N | -0.13658800 | 0.17919700  | 0.33672400  |
| C | 0.77425300  | 0.23938200  | -0.68261900 |
| C | 0.45990100  | 0.24395500  | 1.59691500  |
| H | -0.10518300 | 0.20444600  | 2.51315500  |
| C | 1.79064700  | 0.35325400  | 1.38120300  |
| H | 2.60730000  | 0.42693800  | 2.08012800  |
| C | 3.23742300  | 0.47184300  | -0.69051100 |
| H | 2.99268400  | 0.32204800  | -1.74652700 |
| C | 4.20021500  | -0.66022600 | -0.31610700 |
| O | 5.37534500  | -0.51602300 | -0.09023100 |
| C | 3.87855000  | 1.84548300  | -0.49830300 |
| H | 4.12419800  | 2.02996700  | 0.54954400  |
| C | -1.55559900 | 0.05438600  | 0.12915100  |
| C | -2.33145900 | 1.21411800  | 0.00116000  |
| C | -2.12233500 | -1.22470500 | 0.05162000  |
| C | -3.70695500 | 1.06700800  | -0.19227300 |
| C | -3.50236400 | -1.32090200 | -0.14314500 |
| C | -4.31159600 | -0.18956600 | -0.26177700 |
| H | -4.31770300 | 1.95837300  | -0.29913200 |
| H | -3.95246900 | -2.30663800 | -0.21204100 |
| C | -1.26866900 | -2.46475400 | 0.14900200  |
| H | -0.49433000 | -2.46639100 | -0.62249600 |
| H | -0.75641500 | -2.52837700 | 1.11361500  |
| H | -1.87867300 | -3.36188500 | 0.03078500  |
| C | -1.70077200 | 2.58398100  | 0.04151100  |
| H | -1.16359300 | 2.75509400  | 0.97882100  |
| H | -0.97482300 | 2.70056400  | -0.76775200 |
| H | -2.46010400 | 3.36104500  | -0.06076700 |
| C | -5.80520400 | -0.32092300 | -0.44077300 |
| H | -6.31738700 | -0.32472400 | 0.52780600  |
| H | -6.21174600 | 0.51034300  | -1.02159100 |
| H | -6.06503400 | -1.25098200 | -0.95150400 |
| H | 4.27243100  | -2.52527200 | -0.09642100 |
| H | 4.80196500  | 1.91613800  | -1.07368200 |
| H | 3.18439300  | 2.61559300  | -0.83835800 |

R = <sup>i</sup>Pr

|   |             |             |             |
|---|-------------|-------------|-------------|
| O | 3.76759100  | -1.66591700 | 0.96091500  |
| N | 1.50796400  | -0.03411600 | 0.16384400  |
| N | -0.60762800 | -0.02117600 | 0.41044400  |
| C | 0.34812700  | -0.00612900 | -0.56732500 |
| C | -0.06343800 | -0.05584700 | 1.69564800  |
| H | -0.66937500 | -0.07775900 | 2.58607400  |
| C | 1.27991300  | -0.06308800 | 1.54039900  |
| H | 2.06768600  | -0.11067200 | 2.27115900  |
| C | 2.81810700  | -0.00515600 | -0.49050800 |
| H | 2.59936300  | 0.09297900  | -1.55358900 |
| C | 3.53308600  | -1.34811200 | -0.33812500 |
| O | 3.87948900  | -2.05292200 | -1.24921400 |
| C | 3.70500700  | 1.18067100  | -0.02990000 |
| H | 3.86227800  | 1.07949300  | 1.04997900  |
| C | 5.07746200  | 1.13666200  | -0.71780400 |
| H | 5.68320300  | 1.98880600  | -0.39978500 |
| H | 5.63601400  | 0.22811100  | -0.47872200 |
| H | 4.97381400  | 1.18765300  | -1.80613900 |
| C | 3.00215300  | 2.51686900  | -0.30028700 |
| H | 2.83521800  | 2.65997300  | -1.37237100 |
| H | 2.03438400  | 2.57695800  | 0.20004200  |
| H | 3.62062800  | 3.34463400  | 0.05705800  |
| C | -2.02186000 | -0.01305400 | 0.14188700  |
| C | -2.69756300 | 1.21231100  | 0.07385400  |
| C | -2.68569900 | -1.23240900 | -0.04856400 |
| C | -4.07232800 | 1.19279900  | -0.17406700 |
| C | -4.06042000 | -1.20099400 | -0.29449800 |

|   |             |             |             |
|---|-------------|-------------|-------------|
| C | -4.77223500 | -0.00141500 | -0.35523800 |
| H | -4.60544300 | 2.13682500  | -0.23454900 |
| H | -4.58446800 | -2.13937500 | -0.44895100 |
| C | -1.93801300 | -2.54226200 | -0.01569900 |
| H | -1.16529400 | -2.56802600 | -0.78864900 |
| H | -1.43508900 | -2.69657500 | 0.94343100  |
| H | -2.61938300 | -3.37873200 | -0.17945000 |
| C | -1.96270600 | 2.51999700  | 0.23502300  |
| H | -1.47576300 | 2.59358200  | 1.21186100  |
| H | -1.17959300 | 2.62086700  | -0.52126500 |
| H | -2.64926200 | 3.36232600  | 0.13548500  |
| C | -6.26368400 | 0.00239000  | -0.59069400 |
| H | -6.81020700 | -0.06616800 | 0.35644200  |
| H | -6.58622500 | 0.91969300  | -1.08861400 |
| H | -6.57166300 | -0.84507500 | -1.20755600 |
| H | 4.20472900  | -2.53117100 | 0.96987300  |

R = <sup>i</sup>Bu

|   |             |             |             |
|---|-------------|-------------|-------------|
| O | -3.20071100 | 2.10087400  | 1.00303300  |
| N | -1.09274500 | 0.25300000  | 0.29257800  |
| N | 1.02460100  | 0.10184600  | 0.46522900  |
| C | 0.02932700  | 0.06089700  | -0.47096300 |
| C | 0.53962300  | 0.30810500  | 1.75810900  |
| H | 1.18280200  | 0.37372100  | 2.61980700  |
| C | -0.80507000 | 0.40183900  | 1.65026100  |
| H | -1.55454400 | 0.58350800  | 2.39976200  |
| C | -2.42528100 | 0.24733200  | -0.31556300 |
| H | -2.24440600 | 0.04769500  | -1.36927700 |
| C | -3.08516200 | 1.62489300  | -0.26214600 |
| O | -3.49774700 | 2.22536200  | -1.21998600 |
| C | -3.33164100 | -0.84183900 | 0.29330200  |
| H | -3.43830300 | -0.65415700 | 1.36607600  |
| C | 2.42134900  | -0.04679100 | 0.15078700  |
| C | 2.99527100  | -1.32468600 | 0.17584000  |
| C | 3.17011200  | 1.09137700  | -0.17702900 |
| C | 4.35571600  | -1.44053300 | -0.11968600 |
| C | 4.52679100  | 0.92531300  | -0.46495500 |
| C | 5.13905700  | -0.32910800 | -0.43575800 |
| H | 4.81047600  | -2.42649400 | -0.10888400 |
| H | 5.11605700  | 1.79929300  | -0.72566000 |
| C | 2.52816800  | 2.45474100  | -0.24686700 |
| H | 1.73862200  | 2.47288700  | -1.00299100 |
| H | 2.06512500  | 2.73360100  | 0.70402000  |
| H | 3.26743100  | 3.21639800  | -0.50038300 |
| C | 2.16724400  | -2.54732200 | 0.48500400  |
| H | 1.70717300  | -2.48534900 | 1.47547100  |
| H | 1.35459800  | -2.65841800 | -0.23801000 |
| H | 2.78327800  | -3.44756700 | 0.45360400  |
| C | 6.61518400  | -0.47682100 | -0.71737400 |
| H | 7.20195600  | -0.36703700 | 0.20139500  |
| H | 6.84475500  | -1.45927100 | -1.13631500 |
| H | 6.96493700  | 0.28244300  | -1.42076500 |
| H | -3.62133500 | 2.97240200  | 0.94457900  |
| H | -2.79596000 | -1.79194000 | 0.18756400  |
| C | -4.73200700 | -0.96948200 | -0.33643700 |
| H | -5.24129900 | -0.00127600 | -0.24399100 |
| C | -5.55667000 | -2.00091300 | 0.44727600  |
| H | -6.57115700 | -2.07661200 | 0.04632400  |
| H | -5.10042000 | -2.99488200 | 0.38573400  |
| H | -5.63331200 | -1.73320600 | 1.50530000  |
| C | -4.67817100 | -1.33377500 | -1.82736700 |
| H | -4.18914800 | -0.56137200 | -2.42479100 |
| H | -4.13786200 | -2.27462500 | -1.97920700 |
| H | -5.68783300 | -1.46291500 | -2.22699200 |



Compounds [ $Im^{Ar',Me}$ ]

Ar' = *p*-H<sub>2</sub>NC<sub>6</sub>H<sub>4</sub>

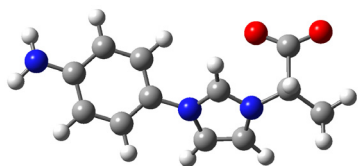

|   |             |             |             |
|---|-------------|-------------|-------------|
| O | 4.37442600  | 1.89583700  | -0.09521800 |
| N | 1.95755500  | -0.74875200 | 0.30082900  |
| N | -0.20358200 | -0.80072900 | -0.00796700 |
| C | 0.80441100  | -0.14073800 | 0.58821200  |
| C | 0.33839800  | -1.85977800 | -0.72636500 |
| H | -0.27342200 | -2.51742700 | -1.31742800 |
| C | 1.68290900  | -1.82119100 | -0.53095500 |
| H | 2.45757900  | -2.45712200 | -0.91768000 |
| C | 3.26116000  | -0.10281600 | 0.56723900  |
| H | 3.33355700  | 0.01862100  | 1.65148100  |
| C | 3.24700500  | 1.40003300  | -0.03555800 |
| O | 2.11306400  | 1.85281200  | -0.30316600 |
| C | 4.42912800  | -0.93614000 | 0.06740700  |
| H | 4.39531100  | -1.06589400 | -1.01788000 |
| C | -1.57507200 | -0.38523100 | 0.00966500  |
| C | -2.58634200 | -1.30127600 | 0.29209200  |
| C | -1.88964500 | 0.94602900  | -0.26488700 |
| C | -3.91176300 | -0.88941300 | 0.29614700  |
| C | -3.21386200 | 1.35902900  | -0.24416400 |
| C | -4.24885700 | 0.44932200  | 0.03179300  |
| H | -4.69402400 | -1.60512700 | 0.52450300  |
| H | -3.45127400 | 2.39606500  | -0.45492100 |
| H | 0.69381100  | 0.73179800  | 1.20231500  |
| H | 4.48376500  | -1.91826000 | 0.54874100  |
| H | 5.33765800  | -0.37993300 | 0.29122700  |
| H | -2.33968800 | -2.33125900 | 0.52279800  |
| H | -1.09957400 | 1.64811200  | -0.50814300 |
| N | -5.56725300 | 0.87322700  | 0.09555600  |
| H | -5.79191100 | 1.74687100  | -0.35479900 |
| H | -6.28357500 | 0.17116300  | -0.00582000 |

Ar' = *p*-HOC<sub>6</sub>H<sub>4</sub>

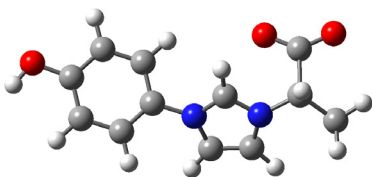

|   |             |             |             |
|---|-------------|-------------|-------------|
| O | 4.35080900  | 1.89363800  | -0.11234500 |
| N | 1.94897000  | -0.75589800 | 0.31135100  |
| N | -0.21098800 | -0.79774700 | -0.00450900 |
| C | 0.79821700  | -0.14336100 | 0.59719100  |
| C | 0.32896600  | -1.85549700 | -0.72762400 |
| H | -0.28318100 | -2.50725100 | -1.32488200 |
| C | 1.67257100  | -1.82237000 | -0.52817300 |
| H | 2.44619700  | -2.45817800 | -0.91726500 |
| C | 3.25158300  | -0.10629700 | 0.57169100  |
| H | 3.32613500  | 0.02211200  | 1.65494200  |
| C | 3.22683900  | 1.39320300  | -0.04097200 |
| O | 2.08802800  | 1.83814600  | -0.30318300 |
| C | 4.42112200  | -0.93765800 | 0.07291400  |
| H | 4.38539200  | -1.07254800 | -1.01164400 |
| C | -1.58030200 | -0.37656800 | 0.01042600  |
| C | -2.59147400 | -1.29263300 | 0.28471400  |

|   |             |             |             |
|---|-------------|-------------|-------------|
| C | -1.88475900 | 0.95950300  | -0.25982800 |
| C | -3.91834900 | -0.87381000 | 0.28423600  |
| C | -3.20706600 | 1.37975500  | -0.24275900 |
| C | -4.22808100 | 0.46391600  | 0.02541500  |
| H | -4.70872000 | -1.58583500 | 0.49913200  |
| H | -3.46476700 | 2.41062100  | -0.45031800 |
| H | 0.68805600  | 0.72377800  | 1.21896800  |
| H | 4.48056000  | -1.91707000 | 0.55900700  |
| H | 5.32828700  | -0.37717900 | 0.29168600  |
| H | -2.34833200 | -2.32383600 | 0.51205700  |
| H | -1.08844800 | 1.65686600  | -0.49592600 |
| O | -5.50571600 | 0.93669700  | 0.01818900  |
| H | -6.12762000 | 0.22709700  | 0.21168100  |

Ar' = *p*-MeC<sub>6</sub>H<sub>4</sub>

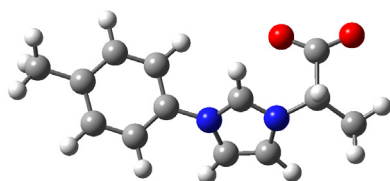

|   |             |             |             |
|---|-------------|-------------|-------------|
| O | 4.37959900  | 1.90201600  | -0.12700800 |
| N | 1.96918500  | -0.74029300 | 0.31003100  |
| N | -0.19081800 | -0.79875200 | -0.00102100 |
| C | 0.81700400  | -0.12460100 | 0.58174000  |
| C | 0.35152700  | -1.87438800 | -0.69504700 |
| H | -0.25871200 | -2.54440000 | -1.27365600 |
| C | 1.69535400  | -1.83027300 | -0.49974100 |
| H | 2.47062100  | -2.47309100 | -0.87368800 |
| C | 3.27244200  | -0.08978900 | 0.56639500  |
| H | 3.34611700  | 0.04672000  | 1.64871500  |
| C | 3.25371000  | 1.40562800  | -0.05619000 |
| O | 2.11740100  | 1.85283700  | -0.32438400 |
| C | 4.44089400  | -0.92740100 | 0.07538900  |
| H | 4.40350800  | -1.07434200 | -1.00757800 |
| C | -1.56381600 | -0.38946400 | 0.01299600  |
| C | -2.56810400 | -1.32190600 | 0.25667400  |
| C | -1.87599600 | 0.94918200  | -0.22217000 |
| C | -3.89702400 | -0.90646400 | 0.25824500  |
| C | -3.20819700 | 1.34749900  | -0.19924200 |
| C | -4.24080600 | 0.43075900  | 0.03367200  |
| H | -4.67717300 | -1.63448900 | 0.45228100  |
| H | -3.44731700 | 2.38995700  | -0.38004700 |
| C | -5.68283900 | 0.87353000  | 0.01887300  |
| H | -6.04020200 | 1.00151700  | -1.00830300 |
| H | -6.33007300 | 0.14126500  | 0.50510400  |
| H | -5.80932400 | 1.83153800  | 0.52878000  |
| H | 0.70565400  | 0.75743300  | 1.18176800  |
| H | 4.50088600  | -1.90138400 | 0.57222500  |
| H | 5.34833000  | -0.36464100 | 0.28704000  |
| H | -2.31605300 | -2.35569400 | 0.46250700  |
| H | -1.08571200 | 1.66022800  | -0.43664100 |

Ar' = C<sub>6</sub>H<sub>5</sub>

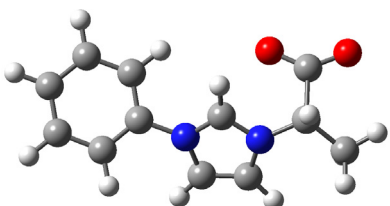

|   |            |            |             |
|---|------------|------------|-------------|
| O | 4.05254900 | 1.73888100 | -0.13493300 |
|---|------------|------------|-------------|

|   |             |             |             |
|---|-------------|-------------|-------------|
| N | 1.51435300  | -0.77614700 | 0.31946300  |
| N | -0.64573500 | -0.70246500 | 0.01206700  |
| C | 0.40223100  | -0.09277000 | 0.59555200  |
| C | -0.17037100 | -1.80590400 | -0.68871600 |
| H | -0.82077300 | -2.43490500 | -1.26962600 |
| C | 1.17371700  | -1.84334900 | -0.49602000 |
| H | 1.90845600  | -2.52945200 | -0.87492500 |
| C | 2.85277000  | -0.19643700 | 0.56373700  |
| H | 2.94480200  | -0.06483400 | 1.64520300  |
| C | 2.90447200  | 1.29777100  | -0.06004800 |
| O | 1.79013100  | 1.79922500  | -0.32643800 |
| C | 3.97074000  | -1.09260400 | 0.05903000  |
| H | 3.91599100  | -1.23217600 | -1.02414900 |
| C | -1.98895200 | -0.20435300 | 0.02300300  |
| C | -3.05079300 | -1.07788200 | 0.25066200  |
| C | -2.20460900 | 1.15460700  | -0.20520300 |
| C | -4.35107600 | -0.57944100 | 0.24504900  |
| C | -3.50935000 | 1.64176100  | -0.19089200 |
| C | -4.58164100 | 0.77865200  | 0.02931200  |
| H | -5.18220500 | -1.25177400 | 0.42220000  |
| H | -3.68517300 | 2.69614000  | -0.36779700 |
| H | 0.34331200  | 0.78851300  | 1.20396200  |
| H | 3.98322900  | -2.07064500 | 0.55126000  |
| H | 4.90866200  | -0.57992200 | 0.26499300  |
| H | -2.86165000 | -2.12687100 | 0.44582800  |
| H | -1.36427900 | 1.80853400  | -0.41101900 |
| H | -5.59496100 | 1.16253200  | 0.03153600  |

Ar' = *p*-FC<sub>6</sub>H<sub>4</sub>

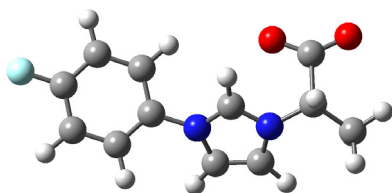

|   |             |             |             |
|---|-------------|-------------|-------------|
| O | 4.29024600  | 1.91726500  | -0.15599200 |
| N | 1.94704600  | -0.76697000 | 0.33084000  |
| N | -0.21247300 | -0.81275500 | 0.01283800  |
| C | 0.79475200  | -0.16046900 | 0.62129800  |
| C | 0.33174200  | -1.86155900 | -0.72226900 |
| H | -0.27723900 | -2.50965600 | -1.32672500 |
| C | 1.67448100  | -1.82499500 | -0.52170800 |
| H | 2.45070700  | -2.45319500 | -0.91809500 |
| C | 3.24107300  | -0.09514400 | 0.57378300  |
| H | 3.32214400  | 0.04806100  | 1.65469600  |
| C | 3.17874400  | 1.39601800  | -0.05800000 |
| O | 2.02604700  | 1.81545600  | -0.30650100 |
| C | 4.42096800  | -0.91072000 | 0.07417200  |
| H | 4.37931600  | -1.05769800 | -1.00852600 |
| C | -1.57858100 | -0.38479700 | 0.02027300  |
| C | -2.59670200 | -1.30615400 | 0.25988000  |
| C | -1.86427000 | 0.95947700  | -0.22265200 |
| C | -3.92190400 | -0.88212900 | 0.25278900  |
| C | -3.18757700 | 1.38972100  | -0.21221600 |
| C | -4.18959800 | 0.45950100  | 0.02118700  |
| H | -4.73666400 | -1.57046600 | 0.43681200  |
| H | -3.44345600 | 2.42490300  | -0.39793900 |
| H | 0.67930000  | 0.69439000  | 1.25874000  |
| H | 4.50115000  | -1.88338800 | 0.57039500  |
| H | 5.32022200  | -0.33258200 | 0.27942600  |
| H | -2.35838800 | -2.34273500 | 0.46563200  |
| H | -1.05864800 | 1.65386600  | -0.43469000 |
| F | -5.47439800 | 0.87247900  | 0.02169500  |

Ar' = *p*-ClC<sub>6</sub>H<sub>4</sub>

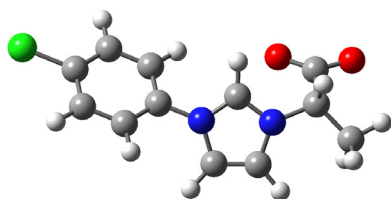

|    |             |             |             |
|----|-------------|-------------|-------------|
| O  | -4.61685400 | -2.02548700 | -0.17005400 |
| N  | -2.36641200 | 0.73364100  | 0.33346600  |
| N  | -0.21151300 | 0.86639700  | 0.00923000  |
| C  | -1.19130700 | 0.16651200  | 0.61081600  |
| C  | -0.79790400 | 1.90576100  | -0.70695800 |
| H  | -0.21677200 | 2.58521900  | -1.30426400 |
| C  | -2.13749900 | 1.81393100  | -0.50387500 |
| H  | -2.93865000 | 2.41720900  | -0.88927000 |
| C  | -3.63428800 | 0.01412600  | 0.57704100  |
| H  | -3.70338600 | -0.14261000 | 1.65691600  |
| C  | -3.52339300 | -1.46811000 | -0.06901100 |
| O  | -2.35760000 | -1.84598100 | -0.32284300 |
| C  | -4.84535200 | 0.79251700  | 0.09296500  |
| H  | -4.81442300 | 0.95450200  | -0.98795200 |
| C  | 1.17069300  | 0.49815900  | 0.01464500  |
| C  | 2.14962200  | 1.46541000  | 0.23273400  |
| C  | 1.51571700  | -0.83500700 | -0.20678300 |
| C  | 3.49139400  | 1.09829900  | 0.22697500  |
| C  | 2.85698900  | -1.20506500 | -0.19532400 |
| C  | 3.83339500  | -0.23548600 | 0.01762100  |
| H  | 4.26335900  | 1.83727700  | 0.39718400  |
| H  | 3.14029400  | -2.23531400 | -0.36670400 |
| H  | -1.04126100 | -0.69076200 | 1.23763900  |
| H  | -4.95871400 | 1.75524600  | 0.60193500  |
| H  | -5.72188100 | 0.17930800  | 0.29482700  |
| H  | 1.86997300  | 2.49467600  | 0.42313100  |
| H  | 0.74319700  | -1.56953500 | -0.40657200 |
| Cl | 5.52299800  | -0.69882500 | 0.02014000  |

Compounds [*Im*<sup>Ar',Me</sup>] (carbene isomer)

Ar' = *p*-H<sub>2</sub>NC<sub>6</sub>H<sub>4</sub>

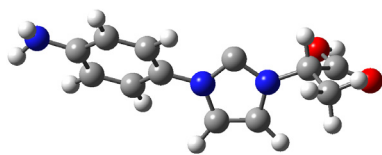

|   |             |             |             |
|---|-------------|-------------|-------------|
| O | 3.41585900  | -1.16424700 | -1.53353600 |
| N | 1.76944500  | 0.22845900  | 0.22397400  |
| N | -0.32560000 | -0.12195000 | 0.38006800  |
| C | 0.58438800  | 0.62132100  | -0.32763200 |
| C | 0.28253400  | -0.94021500 | 1.33400400  |
| H | -0.26880300 | -1.57835500 | 2.00262100  |
| C | 1.61224600  | -0.71716200 | 1.23607800  |
| H | 2.43252200  | -1.14012100 | 1.79201300  |
| C | 3.04774400  | 0.78963700  | -0.20177600 |
| H | 2.80048000  | 1.38780900  | -1.08370100 |
| C | 4.00981200  | -0.30183700 | -0.68349500 |
| O | 5.17355000  | -0.37699200 | -0.37844100 |
| C | 3.68667400  | 1.67619400  | 0.86584600  |
| H | 3.93351400  | 1.10638000  | 1.76393000  |
| C | -1.73555600 | -0.05596300 | 0.15959500  |
| C | -2.32913400 | 1.14980800  | -0.21556200 |
| C | -2.53485600 | -1.18836400 | 0.31000000  |
| C | -3.69864700 | 1.22008600  | -0.43084000 |
| C | -3.90927400 | -1.11517800 | 0.10754000  |

|   |             |             |             |
|---|-------------|-------------|-------------|
| C | -4.51556400 | 0.09128500  | -0.26581300 |
| H | -4.14344500 | 2.16433200  | -0.72829500 |
| H | -4.51406500 | -2.00904400 | 0.22043800  |
| H | 4.08920100  | -1.80335700 | -1.81191800 |
| H | 4.60935900  | 2.11851500  | 0.48874000  |
| H | 2.99071100  | 2.47277900  | 1.13359400  |
| H | -1.70399600 | 2.02353000  | -0.34468100 |
| H | -2.08691100 | -2.14131000 | 0.56601000  |
| N | -5.88699900 | 0.15443500  | -0.53028700 |
| H | -6.45288900 | -0.54838100 | -0.07807400 |
| H | -6.30107400 | 1.07284700  | -0.46881400 |

Ar' = *p*-HOC<sub>6</sub>H<sub>4</sub>

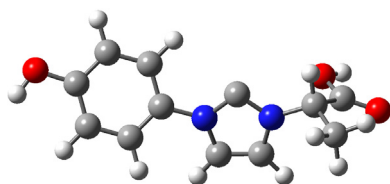

|   |             |             |             |
|---|-------------|-------------|-------------|
| O | 3.39828500  | 1.58916000  | -1.04336500 |
| N | 1.75706200  | -0.25843800 | 0.20658700  |
| N | -0.33822800 | -0.37547300 | -0.15353700 |
| C | 0.57667200  | 0.27092300  | 0.63892400  |
| C | 0.26344200  | -1.26997500 | -1.04129600 |
| H | -0.28736800 | -1.84189200 | -1.76782600 |
| C | 1.59310300  | -1.19931300 | -0.80918900 |
| H | 2.41125400  | -1.71433500 | -1.28470400 |
| C | 3.03718400  | 0.10925600  | 0.80388100  |
| H | 2.79212000  | 0.93110800  | 1.48318300  |
| C | 4.00099500  | 0.69242200  | -0.23568700 |
| O | 5.17304200  | 0.42265300  | -0.31295500 |
| C | 3.67434700  | -1.03791000 | 1.58613600  |
| H | 3.91275500  | -1.88166800 | 0.93538900  |
| C | -1.74521200 | -0.15221200 | -0.06482400 |
| C | -2.64426600 | -1.19459300 | -0.27818700 |
| C | -2.22946800 | 1.12142100  | 0.24490000  |
| C | -4.01725200 | -0.96591500 | -0.20086700 |
| C | -3.59529000 | 1.34840300  | 0.33687500  |
| C | -4.49591300 | 0.30607000  | 0.10842400  |
| H | -4.70966100 | -1.78572300 | -0.36669300 |
| H | -3.97968600 | 2.33210500  | 0.57716400  |
| H | 4.07457300  | 1.93221000  | -1.64706100 |
| H | 4.60150400  | -0.70722300 | 2.05487800  |
| H | 2.98141700  | -1.37389200 | 2.35914600  |
| H | -2.28302300 | -2.19489500 | -0.48440900 |
| H | -1.52211800 | 1.92111400  | 0.42017200  |
| O | -5.83175800 | 0.59415900  | 0.20406100  |
| H | -6.35019600 | -0.19877100 | 0.03293500  |

Ar' = *p*-MeC<sub>6</sub>H<sub>4</sub>

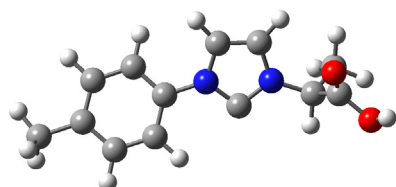

|   |             |             |             |
|---|-------------|-------------|-------------|
| O | -4.88520600 | -1.50221700 | -0.20718900 |
| N | -1.74480900 | 0.21645900  | 0.22193100  |
| N | 0.35891300  | 0.42615300  | -0.04371400 |
| C | -0.57406900 | -0.44315200 | 0.46049700  |
| C | -0.22389800 | 1.58233600  | -0.57139000 |
| H | 0.34019700  | 2.36315100  | -1.05072400 |

|   |             |             |             |
|---|-------------|-------------|-------------|
| C | -1.55739400 | 1.45048700  | -0.40105400 |
| H | -2.36647900 | 2.08828700  | -0.70956100 |
| C | -3.01753500 | -0.33627900 | 0.66380200  |
| H | -2.77469200 | -1.31568100 | 1.07609600  |
| C | -3.97861300 | -0.54121700 | -0.50362100 |
| O | -3.98808600 | 0.07110400  | -1.53952500 |
| C | -3.68726200 | 0.52139300  | 1.75232000  |
| H | -3.93823200 | 1.51573300  | 1.37582800  |
| C | 1.76147400  | 0.16596800  | -0.02227800 |
| C | 2.67858000  | 1.21231100  | 0.05368400  |
| C | 2.22459400  | -1.15088800 | -0.07530700 |
| C | 4.04675200  | 0.94133900  | 0.05984500  |
| C | 3.58985700  | -1.40481600 | -0.05531200 |
| C | 4.52949000  | -0.36702000 | 0.00574000  |
| H | 4.74658800  | 1.76838600  | 0.12098300  |
| H | 3.93306000  | -2.43396700 | -0.09595600 |
| C | 6.00992500  | -0.66232400 | 0.00714400  |
| H | 6.32209400  | -1.12630100 | -0.93411900 |
| H | 6.59681700  | 0.24897500  | 0.13882100  |
| H | 6.27708900  | -1.35290100 | 0.81267300  |
| H | -5.49642000 | -1.56511300 | -0.95709700 |
| H | -4.60220300 | 0.04098200  | 2.10303600  |
| H | -3.00138600 | 0.63012700  | 2.59404600  |
| H | 2.33527100  | 2.23700800  | 0.13041100  |
| H | 1.50450100  | -1.95689800 | -0.12265800 |

Ar' = C<sub>6</sub>H<sub>5</sub>

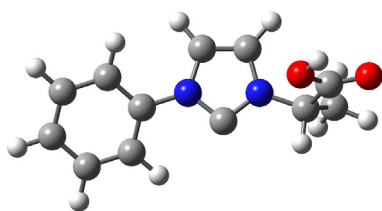

|   |             |             |             |
|---|-------------|-------------|-------------|
| O | 2.92786800  | -1.20814900 | -1.42892800 |
| N | 1.33953300  | 0.21524600  | 0.27077700  |
| N | -0.76420900 | -0.11090700 | 0.34697600  |
| C | 0.18025000  | 0.64896400  | -0.29890900 |
| C | -0.19704300 | -0.97880000 | 1.28394500  |
| H | -0.77509900 | -1.63548500 | 1.91008200  |
| C | 1.13651600  | -0.76941000 | 1.23724400  |
| H | 1.93203100  | -1.22741100 | 1.80087100  |
| C | 2.63765000  | 0.76812400  | -0.09906600 |
| H | 2.41405400  | 1.45457400  | -0.92185200 |
| C | 3.57884100  | -0.28662000 | -0.69071700 |
| O | 4.77680500  | -0.27767900 | -0.55806800 |
| C | 3.30034400  | 1.53744900  | 1.04430500  |
| H | 3.51459800  | 0.88549400  | 1.89399700  |
| C | -2.16177600 | -0.01596900 | 0.07580800  |
| C | -2.70032900 | 1.19798000  | -0.35639900 |
| C | -2.98959000 | -1.12867200 | 0.23633100  |
| C | -4.06279800 | 1.29204500  | -0.62090000 |
| C | -4.35535400 | -1.02038900 | -0.01957000 |
| C | -4.89812000 | 0.18801600  | -0.44901200 |
| H | -4.47455400 | 2.23707800  | -0.95687300 |
| H | -4.99092200 | -1.88970100 | 0.10563200  |
| H | 3.59793800  | -1.80215700 | -1.80021100 |
| H | 4.24307900  | 1.97004100  | 0.70985800  |
| H | 2.63465000  | 2.33614700  | 1.37504700  |
| H | -2.04053300 | 2.04516700  | -0.48677900 |
| H | -2.57170400 | -2.08226300 | 0.53526900  |
| H | -5.95975200 | 0.26846900  | -0.65170700 |

Ar' = *p*-FC<sub>6</sub>H<sub>4</sub>

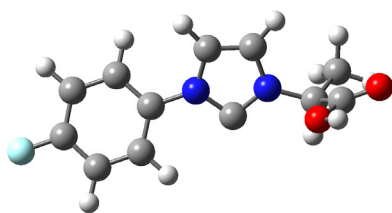

|   |             |             |             |
|---|-------------|-------------|-------------|
| O | -3.38506200 | -1.50449500 | -1.13679900 |
| N | -1.74613100 | 0.25131200  | 0.20982900  |
| N | 0.34866700  | 0.38159500  | -0.14843700 |
| C | -0.56690500 | -0.29402200 | 0.62041600  |
| C | -0.25386500 | 1.30956100  | -1.00185500 |
| H | 0.29423900  | 1.90841700  | -1.70823900 |
| C | -1.58257300 | 1.22898700  | -0.77099200 |
| H | -2.40095600 | 1.76039500  | -1.22756200 |
| C | -3.02558800 | -0.13609500 | 0.79658500  |
| H | -2.77967400 | -0.98091300 | 1.44712100  |
| C | -3.99542300 | -0.68584100 | -0.25529000 |
| O | -5.17813900 | -0.45709700 | -0.28078900 |
| C | -3.65902900 | 0.98331200  | 1.62145300  |
| H | -3.89801100 | 1.85042800  | 1.00219800  |
| C | 1.75359000  | 0.15453000  | -0.06383100 |
| C | 2.65386200  | 1.19855300  | -0.28162800 |
| C | 2.22886000  | -1.12171000 | 0.24678700  |
| C | 4.02645500  | 0.96983500  | -0.20684800 |
| C | 3.59700600  | -1.35364500 | 0.33740300  |
| C | 4.47204400  | -0.30378300 | 0.10293600  |
| H | 4.74005600  | 1.76748600  | -0.36990800 |
| H | 3.98569500  | -2.33532100 | 0.57745500  |
| H | -4.06722800 | -1.83657300 | -1.74013900 |
| H | -4.58522000 | 0.63648700  | 2.07989600  |
| H | -2.96383000 | 1.29063000  | 2.40422200  |
| H | 2.29248900  | 2.19844500  | -0.48746700 |
| H | 1.51722600  | -1.91679300 | 0.42366600  |
| F | 5.80694000  | -0.53093200 | 0.18210200  |

Ar' = *p*-ClC<sub>6</sub>H<sub>4</sub>

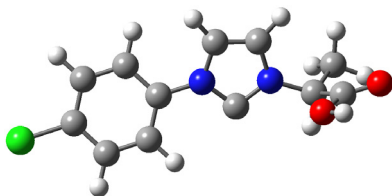

|   |             |             |             |
|---|-------------|-------------|-------------|
| O | -3.76425700 | -1.46363200 | -1.21595300 |
| N | -2.16197600 | 0.24044200  | 0.22151700  |
| N | -0.07248000 | 0.43342400  | -0.14151600 |
| C | -0.96970600 | -0.29949200 | 0.59758700  |
| C | -0.70043000 | 1.39021800  | -0.94393200 |
| H | -0.17117900 | 2.03544100  | -1.62315600 |
| C | -2.02524100 | 1.26886500  | -0.71054000 |
| H | -2.85765100 | 1.80382400  | -1.13645700 |
| C | -3.42928500 | -0.20310700 | 0.79472300  |
| H | -3.16052900 | -1.07005400 | 1.40609800  |
| C | -4.39267800 | -0.72986800 | -0.27455800 |
| O | -5.58461300 | -0.55414300 | -0.26502400 |
| C | -4.08449900 | 0.86258000  | 1.67240100  |
| H | -4.34987900 | 1.75014400  | 1.09402900  |
| C | 1.33573500  | 0.23154400  | -0.07458500 |
| C | 2.21642500  | 1.29261700  | -0.28858000 |
| C | 1.83891300  | -1.03894300 | 0.21337400  |
| C | 3.59281300  | 1.08612300  | -0.23218100 |
| C | 3.21150000  | -1.24669600 | 0.28324200  |

|    |             |             |             |
|----|-------------|-------------|-------------|
| C  | 4.08025600  | -0.18323100 | 0.05419100  |
| H  | 4.27680800  | 1.90883100  | -0.39542900 |
| H  | 3.60431800  | -2.23040900 | 0.50597200  |
| H  | -4.44317100 | -1.79003600 | -1.82607800 |
| H  | -4.99826800 | 0.47205500  | 2.12038000  |
| H  | -3.39159300 | 1.15230300  | 2.46383000  |
| H  | 1.83896400  | 2.29002000  | -0.47708600 |
| H  | 1.14532000  | -1.85044200 | 0.38776200  |
| Cl | 5.81742400  | -0.44883500 | 0.13065200  |

*[NHC<sup>Mes,R</sup>]<sup>-</sup> ligands*

[NHC<sup>Mes,H</sup>]<sup>-</sup>

|   |             |             |             |
|---|-------------|-------------|-------------|
| O | 4.57518100  | -0.67784600 | 0.94539500  |
| N | 2.16344200  | 0.35086300  | -0.18991100 |
| N | 0.07442900  | 0.24071000  | 0.23173500  |
| C | 0.96701800  | 0.14548900  | -0.81141500 |
| C | 0.70846300  | 0.49983600  | 1.45379300  |
| H | 0.17363000  | 0.58251200  | 2.38555200  |
| C | 2.03322900  | 0.56357600  | 1.17532000  |
| H | 2.89806800  | 0.65770000  | 1.80798000  |
| C | 3.44506000  | 0.39938700  | -0.91150800 |
| H | 3.26810300  | -0.04762500 | -1.88740000 |
| C | 4.68797000  | -0.29562200 | -0.24057400 |
| O | 5.67100900  | -0.33804900 | -1.00985800 |
| C | -1.33683100 | 0.07105500  | 0.07982300  |
| C | -2.15920500 | 1.20014700  | -0.04444000 |
| C | -1.87462400 | -1.22460100 | 0.04834400  |
| C | -3.53744400 | 1.01061400  | -0.18119800 |
| C | -3.25768100 | -1.36740900 | -0.09278900 |
| C | -4.10587200 | -0.26388300 | -0.20225700 |
| H | -4.17816400 | 1.88198200  | -0.28673200 |
| H | -3.67920900 | -2.36851900 | -0.12289400 |
| C | -0.97573500 | -2.43137700 | 0.14088800  |
| H | -0.28436200 | -2.45950300 | -0.70523400 |
| H | -0.35743500 | -2.40041200 | 1.04211400  |
| H | -1.56275900 | -3.35264500 | 0.15197800  |
| C | -1.56448400 | 2.58628600  | -0.06590700 |
| H | -1.08506900 | 2.83445900  | 0.88540300  |
| H | -0.79052800 | 2.65900900  | -0.83428900 |
| H | -2.33435700 | 3.33467700  | -0.26766200 |
| C | -5.60180200 | -0.44457200 | -0.32009600 |
| H | -6.07466600 | -0.49968000 | 0.66757000  |
| H | -6.06261500 | 0.38952500  | -0.85596100 |
| H | -5.85120000 | -1.36661800 | -0.85205500 |
| H | 3.71756800  | 1.44773400  | -1.07333600 |

[NHC<sup>Mes,Me</sup>]<sup>-</sup>

|   |             |             |             |
|---|-------------|-------------|-------------|
| O | 4.47663600  | -0.66401700 | 1.12073800  |
| N | 1.95356400  | 0.15603200  | -0.04915400 |
| N | -0.14872500 | 0.09072700  | 0.31376900  |
| C | 0.76425700  | 0.09327600  | -0.71508200 |
| C | 0.46532700  | 0.15572000  | 1.57114300  |
| H | -0.08954700 | 0.14047700  | 2.49487000  |
| C | 1.79838400  | 0.19952700  | 1.33134500  |
| H | 2.66133500  | 0.18584000  | 1.97560100  |
| C | 3.25033200  | 0.24290000  | -0.76044000 |
| H | 3.04833300  | -0.15027900 | -1.75454000 |
| C | 4.42373700  | -0.60580000 | -0.13157900 |
| O | 5.21062500  | -1.06884700 | -0.98314000 |
| C | 3.69003400  | 1.70871400  | -0.87205200 |
| H | 3.87974600  | 2.12995600  | 0.11974000  |
| C | -1.56212300 | 0.00714500  | 0.11522500  |
| C | -2.32358100 | 1.18387600  | 0.07113600  |
| C | -2.16280000 | -1.25131400 | -0.03851100 |
| C | -3.70571100 | 1.07862600  | -0.11002400 |
| C | -3.54748400 | -1.30973500 | -0.21963600 |
| C | -4.33641500 | -0.15839900 | -0.25158100 |



|   |             |             |             |
|---|-------------|-------------|-------------|
| H | -4.29922200 | 1.98796700  | -0.15176900 |
| H | -4.01764700 | -2.28135500 | -0.34530800 |
| C | -1.32794600 | -2.50675200 | -0.03279400 |
| H | -0.59008000 | -2.48031900 | -0.83867400 |
| H | -0.76466500 | -2.60771100 | 0.89908800  |
| H | -1.95693600 | -3.39145100 | -0.15555800 |
| C | -1.65839700 | 2.53298100  | 0.18300800  |
| H | -1.14072600 | 2.64799900  | 1.13944000  |
| H | -0.90180200 | 2.65216600  | -0.59703600 |
| H | -2.39253900 | 3.33647900  | 0.08878900  |
| C | -5.83613100 | -0.25088800 | -0.41472700 |
| H | -6.33592600 | -0.35509900 | 0.55555200  |
| H | -6.24053800 | 0.64400900  | -0.89515700 |
| H | -6.11807400 | -1.11614100 | -1.02067300 |
| H | 2.92191300  | 2.31050600  | -1.36975400 |
| H | 4.61552400  | 1.76328200  | -1.45028900 |

[NHC<sup>Mes,iPr</sup>]-

|   |             |             |             |
|---|-------------|-------------|-------------|
| O | 3.97162400  | -1.34215800 | 1.26384500  |
| N | 1.52847000  | -0.13797100 | 0.13910000  |
| N | -0.58804200 | -0.09303500 | 0.41154300  |
| C | 0.36965100  | -0.03527200 | -0.57573600 |
| C | -0.03092100 | -0.22749600 | 1.68930000  |
| H | -0.62773300 | -0.31487200 | 2.58233100  |
| C | 1.31127400  | -0.25568800 | 1.50752800  |
| H | 2.13746700  | -0.41341500 | 2.18075400  |
| C | 2.87026800  | -0.11569600 | -0.48288900 |
| H | 2.68815800  | -0.24324900 | -1.54972900 |
| C | 3.76267200  | -1.31875700 | 0.02442900  |
| O | 4.18833400  | -2.07921000 | -0.86746500 |
| C | 3.58285000  | 1.23444700  | -0.22871000 |
| H | 3.72582400  | 1.31276200  | 0.85561700  |
| C | 4.97156100  | 1.23703300  | -0.88490700 |
| H | 5.48833900  | 2.18255800  | -0.68406100 |
| H | 5.58971700  | 0.41862300  | -0.51252500 |
| H | 4.88884900  | 1.12261900  | -1.97164100 |
| C | 2.76253200  | 2.43994500  | -0.70949700 |
| H | 2.59571800  | 2.39364900  | -1.79142100 |
| H | 1.78216400  | 2.48268700  | -0.23037500 |
| H | 3.29008400  | 3.37554600  | -0.48916500 |
| C | -1.99345700 | -0.05387100 | 0.14983800  |
| C | -2.68621600 | 1.15891000  | 0.27308500  |
| C | -2.65402600 | -1.23110700 | -0.23364800 |
| C | -4.06228900 | 1.16984500  | 0.02658000  |
| C | -4.02955300 | -1.17311700 | -0.47363900 |
| C | -4.75218000 | 0.01421100  | -0.34228400 |
| H | -4.60274000 | 2.10858800  | 0.11388900  |
| H | -4.54584700 | -2.08030500 | -0.77572600 |
| C | -1.89108200 | -2.52021400 | -0.40314500 |
| H | -1.12385100 | -2.41398300 | -1.17423100 |
| H | -1.36805400 | -2.79829400 | 0.51605000  |
| H | -2.56381000 | -3.33525600 | -0.67972300 |
| C | -1.95566100 | 2.43070900  | 0.62571100  |
| H | -1.46799200 | 2.35972600  | 1.60172200  |
| H | -1.16685500 | 2.63342200  | -0.10370200 |
| H | -2.64296800 | 3.27964600  | 0.64461500  |
| C | -6.24555000 | 0.04183800  | -0.57335200 |
| H | -6.79378900 | -0.21615900 | 0.34039400  |
| H | -6.58166500 | 1.03379000  | -0.88656000 |
| H | -6.54291800 | -0.67443100 | -1.34404800 |

[NHC<sup>Mes,iBu</sup>]-

|   |             |             |             |
|---|-------------|-------------|-------------|
| O | 3.45425800  | -1.75873500 | 1.48149300  |
| N | 1.10647700  | -0.43239500 | 0.30113900  |
| N | -1.01159900 | -0.23426200 | 0.46962000  |
| C | 0.00805500  | -0.12613900 | -0.44776800 |
| C | -0.54791800 | -0.59246900 | 1.74183700  |
| H | -1.20456100 | -0.74766500 | 2.58207400  |
| C | 0.79667600  | -0.71370700 | 1.62711700  |

|   |             |             |             |
|---|-------------|-------------|-------------|
| H | 1.57030400  | -1.02008700 | 2.31189800  |
| C | 2.47740600  | -0.41139500 | -0.25954700 |
| H | 2.33352400  | -0.51408900 | -1.33236200 |
| C | 3.38357300  | -1.60280700 | 0.23728100  |
| O | 3.97893900  | -2.21479000 | -0.67422900 |
| C | 3.13989800  | 0.94085300  | 0.06365900  |
| H | 3.17636200  | 1.04317800  | 1.15402700  |
| C | -2.38891700 | -0.02755100 | 0.14576300  |
| C | -2.98929100 | 1.20572200  | 0.43727100  |
| C | -3.11507000 | -1.06112500 | -0.46550400 |
| C | -4.34070300 | 1.38101100  | 0.12501500  |
| C | -4.46230700 | -0.84048200 | -0.76386500 |
| C | -5.09495300 | 0.36917200  | -0.47063000 |
| H | -4.80836600 | 2.33752800  | 0.34226100  |
| H | -5.02813600 | -1.63562000 | -1.24186600 |
| C | -2.44993000 | -2.36961500 | -0.80947400 |
| H | -1.63232600 | -2.21017600 | -1.51691100 |
| H | -2.00637300 | -2.83557100 | 0.07487300  |
| H | -3.16877900 | -3.06678900 | -1.24602500 |
| C | -2.18470000 | 2.32985600  | 1.04137900  |
| H | -1.82339200 | 2.07606100  | 2.04200800  |
| H | -1.30016200 | 2.53820500  | 0.43389100  |
| H | -2.78491400 | 3.23969200  | 1.11395600  |
| C | -6.56232700 | 0.56889200  | -0.77209400 |
| H | -7.18935100 | 0.21371600  | 0.05415100  |
| H | -6.79650200 | 1.62511500  | -0.92885200 |
| H | -6.86331400 | 0.01968800  | -1.66831700 |
| H | 2.49358600  | 1.74351000  | -0.31951500 |
| C | 4.56255000  | 1.12312600  | -0.49582300 |
| H | 5.18423800  | 0.31787200  | -0.08921600 |
| C | 5.14732700  | 2.46176600  | -0.02032200 |
| H | 6.17917800  | 2.58863800  | -0.36660200 |
| H | 4.56184700  | 3.30622600  | -0.40513600 |
| H | 5.14917700  | 2.52858000  | 1.07257800  |
| C | 4.61100500  | 1.01882100  | -2.02679300 |
| H | 4.32388200  | 0.01885800  | -2.35673700 |
| H | 3.93793700  | 1.75004500  | -2.49214100 |
| H | 5.62419200  | 1.21431400  | -2.39645600 |

*Model compounds*  $\{Ag[NHC^{Mes,R}]\}_2$

$\{Ag[NHC^{Mes,H}]\}_2$ , **2a<sub>c</sub>**

|    |             |             |             |
|----|-------------|-------------|-------------|
| Ag | -2.12210700 | -0.85554600 | -0.50147300 |
| O  | -0.41658900 | 4.11613100  | 0.15216800  |
| N  | -2.25583300 | 2.24568900  | -0.85495400 |
| N  | -4.12935500 | 1.50333900  | -0.09648800 |
| C  | -2.89586000 | 1.10100100  | -0.50615500 |
| C  | -4.25164300 | 2.88714800  | -0.18773000 |
| H  | -5.15640400 | 3.39971200  | 0.09861200  |
| C  | -3.06628600 | 3.35260600  | -0.65986600 |
| H  | -2.70046500 | 4.35165700  | -0.82449900 |
| C  | -0.87858400 | 2.30626700  | -1.34324600 |
| H  | -0.53435900 | 1.27770700  | -1.45019500 |
| C  | 0.06338700  | 3.14611700  | -0.42757600 |
| O  | 1.29919000  | 2.78257100  | -0.43576700 |
| C  | -5.16308200 | 0.61992600  | 0.38252900  |
| C  | -6.08307000 | 0.08974300  | -0.53621200 |
| C  | -5.22571300 | 0.33232300  | 1.75636100  |
| C  | -7.08333500 | -0.75417500 | -0.04319200 |
| C  | -6.24549800 | -0.51657800 | 2.19656400  |
| C  | -7.17868400 | -1.07345600 | 1.31520000  |
| H  | -7.80499400 | -1.17286600 | -0.74101900 |
| H  | -6.30911000 | -0.74955400 | 3.25710000  |
| Ag | 2.12204000  | 0.85516800  | -0.50158600 |
| O  | 0.41672900  | -4.11490300 | 0.15388100  |
| N  | 2.25614200  | -2.24610800 | -0.85533800 |
| N  | 4.12946200  | -1.50341800 | -0.09671400 |
| C  | 2.89602500  | -1.10128600 | -0.50677400 |
| C  | 4.25185900  | -2.88724600 | -0.18751800 |
| H  | 5.15658700  | -3.39966800 | 0.09918000  |
| C  | 3.06660500  | -3.35291500 | -0.65970700 |
| H  | 2.70090500  | -4.35205100 | -0.82410400 |
| C  | 0.87899900  | -2.30695100 | -1.34384700 |

|   |             |             |             |
|---|-------------|-------------|-------------|
| H | 0.53479800  | -1.27846900 | -1.45161500 |
| C | -0.06323100 | -3.14601300 | -0.42771200 |
| O | -1.29920300 | -2.78300700 | -0.43764200 |
| C | 5.16306300  | -0.61978300 | 0.38217000  |
| C | 6.08333100  | -0.09010800 | -0.53658300 |
| C | 5.22527800  | -0.33143100 | 1.75586400  |
| C | 7.08346600  | 0.75405900  | -0.04372500 |
| C | 6.24495600  | 0.51767800  | 2.19591000  |
| C | 7.17842000  | 1.07406100  | 1.31452400  |
| H | 7.80533500  | 1.17236700  | -0.74156300 |
| H | 6.30825400  | 0.75123000  | 3.25633800  |
| H | 0.87695900  | -2.76753100 | -2.33927500 |
| H | -0.87639500 | 2.76611900  | -2.33901500 |
| C | -5.99837600 | 0.40965700  | -2.01013200 |
| H | -6.03314300 | 1.48958800  | -2.19554300 |
| H | -5.06078900 | 0.04260400  | -2.44445700 |
| H | -6.82641100 | -0.05389000 | -2.55376200 |
| C | -4.22497400 | 0.90807800  | 2.73048000  |
| H | -3.21203500 | 0.54213100  | 2.52463300  |
| H | -4.18295100 | 2.00186400  | 2.67628100  |
| H | -4.48121500 | 0.62867800  | 3.75622900  |
| C | -8.24789900 | -2.01529900 | 1.81765100  |
| H | -7.86843000 | -3.04377500 | 1.87746100  |
| H | -8.58854800 | -1.73665100 | 2.82063400  |
| H | -9.11795500 | -2.02625600 | 1.15313300  |
| C | 5.99904100  | -0.41082600 | -2.01035100 |
| H | 6.03470600  | -1.49082500 | -2.19520800 |
| H | 5.06119500  | -0.04475900 | -2.44494300 |
| H | 6.82676300  | 0.05309900  | -2.55413200 |
| C | 4.22422500  | -0.90660000 | 2.73000800  |
| H | 3.21148100  | -0.54012500 | 2.52412100  |
| H | 4.18162200  | -2.00036500 | 2.67588900  |
| H | 4.48058500  | -0.62724200 | 3.75573900  |
| C | 8.24751000  | 2.01613500  | 1.81681100  |
| H | 7.86782800  | 3.04452700  | 1.87669000  |
| H | 8.58836800  | 1.73755800  | 2.81974500  |
| H | 9.11746500  | 2.02727300  | 1.15216700  |

{Ag[NHC<sup>Mes,Me</sup>]}<sub>2</sub>, **2b<sub>c</sub>**

|    |             |             |             |
|----|-------------|-------------|-------------|
| Ag | -1.96964900 | -0.86181200 | -0.72430800 |
| O  | -0.25995400 | 4.46217500  | -0.90017600 |
| N  | -2.15719300 | 2.26051300  | -0.90286800 |
| N  | -3.78001700 | 1.46737500  | 0.27179000  |
| C  | -2.68889000 | 1.09590600  | -0.45398300 |
| C  | -3.92104200 | 2.85179100  | 0.27334000  |
| H  | -4.72221900 | 3.34260900  | 0.80329300  |
| C  | -2.89726500 | 3.35051400  | -0.46675900 |
| H  | -2.57750600 | 4.35621200  | -0.68361600 |
| C  | -0.96094200 | 2.35092900  | -1.76475700 |
| H  | -0.57468900 | 1.33165700  | -1.81808800 |
| C  | 0.09949400  | 3.30645100  | -1.12920600 |
| O  | 1.28022800  | 2.82821000  | -0.94937600 |
| C  | -1.33557200 | 2.83862000  | -3.16789500 |
| H  | -1.69602900 | 3.87031100  | -3.12848700 |
| C  | -4.66430000 | 0.55485300  | 0.95278400  |
| C  | -5.78255100 | 0.05364200  | 0.26629200  |
| C  | -4.38368300 | 0.20263300  | 2.28304100  |
| C  | -6.62808000 | -0.82416300 | 0.95124400  |
| C  | -5.26166700 | -0.67857200 | 2.92219000  |
| C  | -6.38736200 | -1.20089900 | 2.27698800  |
| H  | -7.49559400 | -1.22553800 | 0.43215000  |
| H  | -5.05579300 | -0.96636900 | 3.95068000  |
| C  | -3.16826300 | 0.73888000  | 3.00207500  |
| H  | -2.24127400 | 0.39577500  | 2.52731600  |
| H  | -3.14020500 | 1.83455900  | 2.99689800  |
| H  | -3.15782800 | 0.40427800  | 4.04318100  |
| C  | -6.06345500 | 0.43298200  | -1.16880400 |
| H  | -6.13550400 | 1.51931400  | -1.29717600 |
| H  | -5.26649500 | 0.08561700  | -1.83702800 |
| H  | -7.00394700 | -0.01066800 | -1.50729600 |
| C  | -7.33534700 | -2.12774800 | 3.00158400  |
| H  | -8.15133700 | -1.56612700 | 3.47583700  |
| H  | -7.79247100 | -2.84872600 | 2.31584200  |
| H  | -6.82278600 | -2.68759100 | 3.79049000  |

|    |             |             |             |
|----|-------------|-------------|-------------|
| Ag | 1.96955700  | 0.86195400  | -0.72442400 |
| O  | 0.25983500  | -4.46199500 | -0.90110900 |
| N  | 2.15707900  | -2.26033400 | -0.90363600 |
| N  | 3.78006600  | -1.46742700 | 0.27095400  |
| C  | 2.68883300  | -1.09581600 | -0.45458900 |
| C  | 3.92109700  | -2.85184200 | 0.27220200  |
| H  | 4.72234800  | -3.34276500 | 0.80194600  |
| C  | 2.89723500  | -3.35041800 | -0.46787700 |
| H  | 2.57746100  | -4.35607300 | -0.68491100 |
| C  | 0.96069900  | -2.35057700 | -1.76536500 |
| H  | 0.57444500  | -1.33129200 | -1.81844100 |
| C  | -0.09964400 | -3.30622300 | -1.12984600 |
| O  | -1.28035000 | -2.82801700 | -0.94973400 |
| C  | 1.33512200  | -2.83799400 | -3.16865400 |
| H  | 1.69558300  | -3.86969300 | -3.12950000 |
| C  | 4.66443100  | -0.55504000 | 0.95202200  |
| C  | 5.78260100  | -0.05369700 | 0.26550200  |
| C  | 4.38396800  | -0.20308000 | 2.28238300  |
| C  | 6.62821200  | 0.82397300  | 0.95053100  |
| C  | 5.26202600  | 0.67799500  | 2.92160400  |
| C  | 6.38764900  | 1.20044800  | 2.27637400  |
| H  | 7.49566700  | 1.22544800  | 0.43141600  |
| H  | 5.05626900  | 0.96559100  | 3.95017400  |
| C  | 3.16863000  | -0.73947200 | 3.00145000  |
| H  | 2.24158600  | -0.39632000 | 2.52683100  |
| H  | 3.14060300  | -1.83515100 | 2.99610600  |
| H  | 3.15828500  | -0.40503100 | 4.04260900  |
| C  | 6.06334700  | -0.43275400 | -1.16970000 |
| H  | 6.13537800  | -1.51906100 | -1.29829700 |
| H  | 5.26631500  | -0.08525400 | -1.83776900 |
| H  | 7.00380300  | 0.01096000  | -1.50820800 |
| C  | 7.33571400  | 2.12714800  | 3.00105600  |
| H  | 8.15143200  | 1.56537500  | 3.47559700  |
| H  | 7.79319700  | 2.84789800  | 2.31531700  |
| H  | 6.82311500  | 2.68724900  | 3.78975700  |
| H  | -0.44818500 | 2.81686800  | -3.80956900 |
| H  | -2.10591000 | 2.19965900  | -3.61380800 |
| H  | 2.10539400  | -2.19894700 | -3.61455700 |
| H  | 0.44764000  | -2.81611500 | -3.81019200 |

**{Ag[NHC<sup>Mes,iPr</sup>]}<sub>2</sub>, **2c<sub>c</sub>****

|    |             |             |             |
|----|-------------|-------------|-------------|
| Ag | 1.86755900  | 0.93720100  | -0.38986300 |
| O  | 0.37118500  | -4.40409000 | -1.16575100 |
| N  | 2.19703700  | -2.14712500 | -0.86002200 |
| N  | 3.69845700  | -1.41402900 | 0.50085500  |
| C  | 2.64301000  | -1.01355600 | -0.26230300 |
| C  | 3.90126300  | -2.78518600 | 0.37909000  |
| H  | 4.68612900  | -3.29550800 | 0.91501100  |
| C  | 2.95318500  | -3.24625900 | -0.47716200 |
| H  | 2.69428900  | -4.23775800 | -0.81017100 |
| C  | 1.05759400  | -2.20933200 | -1.79710900 |
| H  | 0.64449500  | -1.19754600 | -1.80895200 |
| C  | 0.00600800  | -3.23002900 | -1.25327500 |
| O  | -1.16625900 | -2.77939700 | -0.97633300 |
| C  | 1.50592200  | -2.59673500 | -3.22576500 |
| H  | 1.89139100  | -3.62256900 | -3.16620300 |
| C  | 4.48980200  | -0.54201900 | 1.33288200  |
| C  | 5.62628200  | 0.07474500  | 0.78383600  |
| C  | 4.10332600  | -0.34453900 | 2.66863900  |
| C  | 6.37900900  | 0.91030700  | 1.61431200  |
| C  | 4.89116900  | 0.50076800  | 3.45620500  |
| C  | 6.03036900  | 1.13535400  | 2.95051600  |
| H  | 7.25914600  | 1.40017500  | 1.20375100  |
| H  | 4.60263700  | 0.66953500  | 4.49121000  |
| C  | 2.87137400  | -1.00607800 | 3.23983200  |
| H  | 1.96246800  | -0.65843000 | 2.73467000  |
| H  | 2.90115500  | -2.09559100 | 3.12407600  |
| H  | 2.77231100  | -0.78117500 | 4.30550600  |
| C  | 6.02088100  | -0.14046100 | -0.65825600 |
| H  | 6.12553100  | -1.20509500 | -0.89710400 |
| H  | 5.26784600  | 0.26749700  | -1.34311500 |
| H  | 6.97379600  | 0.35053600  | -0.87519300 |
| C  | 6.87997400  | 2.02052100  | 3.83243500  |
| H  | 7.69309700  | 1.44890200  | 4.29967200  |

|    |             |             |             |
|----|-------------|-------------|-------------|
| H  | 7.34037700  | 2.83207800  | 3.25941600  |
| H  | 6.28928900  | 2.46683300  | 4.63888700  |
| Ag | -1.86871900 | -0.85025700 | -0.55060400 |
| O  | -0.37424500 | 4.54483800  | -0.33260700 |
| N  | -2.20008100 | 2.26952400  | -0.44957900 |
| N  | -3.69855500 | 1.29591200  | 0.75465500  |
| C  | -2.64275100 | 1.04458000  | -0.06904800 |
| C  | -3.90532800 | 2.66555000  | 0.88569500  |
| H  | -4.69096300 | 3.06706700  | 1.50634600  |
| C  | -2.95881700 | 3.27797300  | 0.12841800  |
| H  | -2.70233200 | 4.31431900  | -0.01677500 |
| C  | -1.06402400 | 2.50762800  | -1.36273900 |
| H  | -0.64932300 | 1.51742600  | -1.56750000 |
| C  | -0.01019900 | 3.40818700  | -0.64077800 |
| O  | 1.16268000  | 2.91314900  | -0.45807100 |
| C  | -1.52236400 | 3.15644900  | -2.69019300 |
| H  | -1.92741800 | 4.14364400  | -2.43349200 |
| C  | -4.48504500 | 0.28370600  | 1.41422200  |
| C  | -5.60931800 | -0.24178500 | 0.75415000  |
| C  | -4.10740500 | -0.13858800 | 2.69835500  |
| C  | -6.35684900 | -1.21803300 | 1.41744900  |
| C  | -4.89155200 | -1.11759400 | 3.31893900  |
| C  | -6.01591900 | -1.66908700 | 2.69829700  |
| H  | -7.22736900 | -1.63815200 | 0.91826800  |
| H  | -4.61060600 | -1.45900300 | 4.31252900  |
| C  | -2.88862700 | 0.42594300  | 3.38964000  |
| H  | -1.96980200 | 0.17222900  | 2.84745000  |
| H  | -2.92496900 | 1.51925800  | 3.45639700  |
| H  | -2.80206200 | 0.02714100  | 4.40431200  |
| C  | -5.99791600 | 0.21904300  | -0.63110400 |
| H  | -6.14081400 | 1.30518200  | -0.67396300 |
| H  | -5.22419400 | -0.03027000 | -1.36694700 |
| H  | -6.92985400 | -0.25748600 | -0.94793800 |
| C  | -6.85877700 | -2.71153400 | 3.39539100  |
| H  | -7.81246700 | -2.28706300 | 3.73566400  |
| H  | -7.09738500 | -3.54487100 | 2.72507500  |
| H  | -6.34663500 | -3.11905900 | 4.27229300  |
| C  | 2.60889700  | -1.67370300 | -3.76206100 |
| H  | 2.26093400  | -0.63421000 | -3.82486100 |
| H  | 3.50372700  | -1.68959500 | -3.13098300 |
| H  | 2.90677300  | -1.98453100 | -4.77003100 |
| C  | 0.29208900  | -2.60463500 | -4.16886200 |
| H  | -0.47887400 | -3.30350000 | -3.83075700 |
| H  | -0.15982300 | -1.60622200 | -4.23887300 |
| H  | 0.59798000  | -2.90131700 | -5.17826000 |
| C  | -0.31302900 | 3.37241800  | -3.61397400 |
| H  | 0.43956900  | 4.01770800  | -3.15116500 |
| H  | 0.16583800  | 2.41768600  | -3.86855600 |
| H  | -0.63168200 | 3.84325100  | -4.55068400 |
| C  | -2.60930700 | 2.33363200  | -3.39561400 |
| H  | -2.23909900 | 1.33594500  | -3.66606500 |
| H  | -3.49870000 | 2.20215600  | -2.77050400 |
| H  | -2.92236900 | 2.83216700  | -4.32011700 |

{Ag[NHC<sup>Mes,iBu</sup>]}<sub>2</sub>, **2d**

|    |             |             |             |
|----|-------------|-------------|-------------|
| Ag | 1.88147200  | 0.30791300  | 1.14352100  |
| O  | 0.53600400  | 1.98157300  | -4.06380700 |
| N  | 2.30656600  | 1.16015600  | -1.84604800 |
| N  | 3.70116300  | -0.38098500 | -1.27955000 |
| C  | 2.69766200  | 0.40211300  | -0.79210800 |
| C  | 3.92494500  | -0.11197900 | -2.62618800 |
| H  | 4.67606800  | -0.63670300 | -3.19551100 |
| C  | 3.04394900  | 0.85818100  | -2.98238500 |
| H  | 2.82230200  | 1.32931000  | -3.92607700 |
| C  | 1.24586000  | 2.18880500  | -1.79635500 |
| H  | 0.81304700  | 2.09979400  | -0.79922200 |
| C  | 0.17637900  | 1.87099800  | -2.89031000 |
| O  | -1.00157800 | 1.54976700  | -2.48343900 |
| C  | 1.85631800  | 3.58542300  | -1.99870300 |
| H  | 2.31924900  | 3.60513000  | -2.99168700 |
| C  | 4.42816500  | -1.35950100 | -0.51018100 |
| C  | 5.58701100  | -0.95934400 | 0.17648800  |
| C  | 3.96029400  | -2.68269400 | -0.47782600 |
| C  | 6.27621700  | -1.92809100 | 0.91102800  |

|    |             |             |             |
|----|-------------|-------------|-------------|
| C  | 4.68763200  | -3.61321500 | 0.27203100  |
| C  | 5.84488000  | -3.25817400 | 0.97145600  |
| H  | 7.17215600  | -1.63314500 | 1.45284200  |
| H  | 4.33524100  | -4.64132400 | 0.31240800  |
| C  | 2.70562000  | -3.09485900 | -1.21108300 |
| H  | 1.82324000  | -2.58249300 | -0.80912500 |
| H  | 2.75559000  | -2.84950400 | -2.27817000 |
| H  | 2.54178100  | -4.17217800 | -1.11815200 |
| C  | 6.07299900  | 0.47053700  | 0.13870100  |
| H  | 6.24248100  | 0.81685600  | -0.88759600 |
| H  | 5.34215000  | 1.15290800  | 0.58845900  |
| H  | 7.01236300  | 0.57232400  | 0.68930000  |
| C  | 6.62675700  | -4.28688000 | 1.75460900  |
| H  | 7.49628100  | -4.64079000 | 1.18486100  |
| H  | 7.00352700  | -3.87102100 | 2.69532200  |
| H  | 6.01213800  | -5.16062000 | 1.99268800  |
| Ag | -1.69518300 | 0.55872700  | -0.77222400 |
| O  | -0.40093900 | -0.85434400 | 4.43054900  |
| N  | -2.18929500 | -0.36053700 | 2.19464400  |
| N  | -3.36969800 | -1.51945900 | 0.81350100  |
| C  | -2.47768700 | -0.49125100 | 0.87522300  |
| C  | -3.62640000 | -2.02518400 | 2.08388700  |
| H  | -4.30156900 | -2.85117300 | 2.24350900  |
| C  | -2.87878600 | -1.29646400 | 2.95240000  |
| H  | -2.71439400 | -1.38254200 | 4.01332200  |
| C  | -1.24077300 | 0.62390700  | 2.75496200  |
| H  | -0.85233600 | 1.17039700  | 1.89502400  |
| C  | -0.08220700 | -0.12930800 | 3.48774500  |
| O  | 1.11492500  | 0.11763300  | 3.08286300  |
| C  | -1.92876000 | 1.58251800  | 3.74414400  |
| H  | -2.23886500 | 0.99443400  | 4.61575900  |
| C  | -3.95205500 | -2.03165300 | -0.40146700 |
| C  | -5.15265400 | -1.47268000 | -0.86998900 |
| C  | -3.30448900 | -3.08179600 | -1.07231500 |
| C  | -5.69903000 | -1.99490900 | -2.04588700 |
| C  | -3.89345100 | -3.56781200 | -2.24396200 |
| C  | -5.08781100 | -3.04099500 | -2.74595000 |
| H  | -6.62592500 | -1.56987500 | -2.42465200 |
| H  | -3.40192900 | -4.37729200 | -2.77878500 |
| C  | -2.00800800 | -3.66372700 | -0.56013100 |
| H  | -1.21072300 | -2.91092600 | -0.54691100 |
| H  | -2.10529600 | -4.03910500 | 0.46514900  |
| H  | -1.68017600 | -4.49247500 | -1.19408900 |
| C  | -5.83100200 | -0.33646800 | -0.14132300 |
| H  | -6.02136000 | -0.58241100 | 0.90983200  |
| H  | -5.21269900 | 0.56911400  | -0.14979000 |
| H  | -6.78832700 | -0.09446700 | -0.61150200 |
| C  | -5.71869200 | -3.60428400 | -3.99798700 |
| H  | -6.47900500 | -4.35781200 | -3.75249200 |
| H  | -6.21373400 | -2.82212600 | -4.58309100 |
| H  | -4.97415600 | -4.08726900 | -4.63870300 |
| H  | 2.65584200  | 3.72721400  | -1.25662600 |
| H  | -1.15196800 | 2.27018800  | 4.10744300  |
| C  | -3.11955700 | 2.40001800  | 3.20768000  |
| H  | -3.85622800 | 1.69818100  | 2.78947800  |
| C  | -3.79646100 | 3.14946200  | 4.36667900  |
| H  | -4.66886000 | 3.71330300  | 4.01587500  |
| H  | -4.13313000 | 2.45843000  | 5.14859100  |
| C  | -3.10332000 | 3.86364800  | 4.82988600  |
| C  | -2.71399800 | 3.37952400  | 2.09632500  |
| H  | -2.31389100 | 2.86393900  | 1.21572500  |
| H  | -3.57559100 | 3.97025600  | 1.76308400  |
| H  | -1.94759800 | 4.08110600  | 2.45145700  |
| C  | 0.85190100  | 4.75096000  | -1.90269100 |
| H  | 0.06223300  | 4.57216500  | -2.64533700 |
| C  | 1.55201000  | 6.06812900  | -2.27192500 |
| H  | 0.84551900  | 6.90623600  | -2.25499600 |
| H  | 2.35821100  | 6.29871100  | -1.56274700 |
| H  | 1.99119500  | 6.01901500  | -3.27520600 |
| C  | 0.19534500  | 4.85745500  | -0.51765500 |
| H  | -0.40052400 | 3.97133000  | -0.27421100 |
| H  | 0.95167900  | 4.98541600  | 0.26881000  |
| H  | -0.47746300 | 5.72193300  | -0.47390000 |
